# INDEX OF AUTHORS AND SUBJECTS • VOLUME 48

**Index of Issues:** January, pp. 1–86; February, pp. 87–164; March, pp. 165–234; April, pp. 235–308; May, pp. 309–392; June, pp. 393–472.

Author entries for original articles include the titles of the articles and co-authors under the first-author; reference is made from the joint authors.

Subject entries for all material in the JOURNAL appear in this index. The name of the author of an original article, in brackets, follows the subject entry. Entries from the JOURNAL departments are identified by the departments in which the subject matter appears, e.g., Clinical Reports.

AASHEIM, G. M., see FINK, B. R., jt. auth.

Abdomen, intra-abdominal pressure, hemodynamics of increased, hypovolemia and halothane anesthesia interaction with [Diamant & others], 23

ABOULEISH, E., KLIONSRY, B. L., and TAYLOR, F. H., Lidocaine effects on leukocytes and erythrocytes (correspondence), 295

Acetylcholine

biosynthesis, brain, during anesthesia with halothane, enflurane, and ketamine [Ngai & others], 4

brain concentrations and turnover during anesthesia with halothane, enflurane, and ketamine [Ngai & others], 4

metabolism, brain, anesthetics and (editorial views) [Hanin], 1

Acid–base equilibrium

acidosis, fetal, lidocaine placental transfer response to [Biehl & others], 409

pH of gastric fluid, responses to atropine, glycopyrrolate, and Riopan (clinical report) [Stoelting], 367

Acid pneumonitis, see under Complications, pneumonitis

Acidosis, see under Acid–base equilibrium

ACKERLY, J. A., see MILLER, E. D., Jr., jt. auth.

Air embolism, see under Embolism

Airway

see also under Equipment

closure, anesthesia and (correspondence) [Wahba], 293

obstruction, endotracheal intubation complicated by uvular edema (clinical report) [Ravindran & Priddy], 374

ALBRECHT, R. F., see MILETICH, D. J., jt. auth.

ALBRECHT, W. H., see HULL, M. T., jt. auth.

Alling, C. C., III, and Mahan, P. E. (eds.), *Facial Pain* (book review), 234

Alpha-bungarotoxin, see under Neuromuscular relaxants

Alphadione, see under Anesthetics, intravenous, steroid

Ambient temperature, see under Temperature

AMENT, R., Anesthesia and surgical care—manpower needs and utilization (editorial views), 88

American Board of Anesthesiology, see under Organizations

American Society of Anesthesiologists, see under Organizations

Amines, vasoactive, see under Sympathetic nervous system; Sympathetic nervous system, catecholamines

Amino acids, see under Metabolism

Aminoglycosides, see under Antibiotics

Analgesia, see also under Analgesics, narcotic; Analgesics, non-narcotic; Anesthetic techniques, spinal

Analgesics

narcotic, fentanyl, choledochoduodenal sphincter spasm associated with, naloxone reversal (clinical report) [McCammon & others], 437

premedication, sedation vs. relief of anxiety (correspondence) [Conner], 300

Anatomy

jugular vein, internal

supraclavicular catheterization, precaution (correspondence) [Rao & others], 448

supraclavicular catheterization, precaution (correspondence) [Schwartz], 448

radial artery, cannulation, wrist circumference predicts risk of occlusion after (clinical report) [Bedford], 377

Anesthesia

see also Acupuncture; Anesthesiology; Anesthetic techniques; Anesthetics, gases; Anesthetics, intravenous; Anesthetics, local; Anesthetics, rectal; Anesthetics, volatile; Complications; Equipment; History; Induction; Potency; Physics; Records; Recovery; Surgery; Theories

dental

general anesthesia by dentists, acceptability considered (correspondence) [Klein & others], 385

general anesthesia by dentists, acceptability considered (correspondence) [McLaughlin], 384

machines, see under Equipment

neurosurgical

embolism, air, venous, monitoring, methods compared in supine dogs, [English & others], 425

intracardiac catheters unnecessary in (correspondence) [Jackson], 154

symposium, 8th International Cerebral Blood Flow Symposium (report of scientific meeting) [Shapiro], 231

obstetric

Apgar score, neurologic activity of infants following anesthesia for cesarean section [Hollmen & others], 350

bupivacaine-induced seizure (correspondence) [DeVore & Asrani], 386

cesarean section, neurologic activity of infants following [Hollmen & others], 350

fetal neuropharmacology (editorial views) [Holtzman], 235

fetal rat brain metabolism during maternal anesthesia [Vannucci & Wolf], 238

fetus, acidosis effects on lidocaine placental transfer [Biehl & others], 409

lidocaine, monoethylglycinexylidide, and isolated human uterine muscle [Munson & Embro], 183

lidocaine, placental transfer, effects of fetal acidosis [Biehl & others], 409

paternal fractured skull as complication (correspondence) [DeVore & Asrani], 386

regional, fetal and neonatal effects of (review article) [Ralston & Shnider], 34

pediatric

Bain anesthetic circuit in controlled ventilation of children, new concept in [Rayburn & Graves], 250

bronchial suctioning techniques evaluated (clinical report) [Salem & others], 379

endotracheal tube size markings (correspondence) [Downes], 157

endotracheal tube size markings (correspondence) [Morley], 157

humidification, heated (correspondence) [Wallace & others], 80

hyperthermia, benign iatrogenic (clinical report) [Fraser], 375

reversal, pressure, of various anesthetics in mice [Miller & Wilson], 104

Anesthesiologists

competence, residents, how faculty members define [Orkin & Greenhow], 267

education, professional activity monitoring, distribution (special article) [Eckenhoff], 272

- medical knowledge, new  
 acquisition and use (editorial views) [Warner], 396  
 acquisition and use (special article) [Fineberg & others], 430
- surgical care  
 manpower needs and utilization (editorial views) [Ament], 88  
 manpower needs and utilization (special article) [Moore], 125
- Anesthesiology  
 overview (special article) [Eckenhoff], 272  
 surgical care and  
 manpower needs and utilization in (editorial views) [Ament], 88  
 manpower needs and utilization (special article) [Moore], 125
- Anesthetic circuit, see under Equipment, circuits
- Anesthetic techniques  
 hypotension, induced  
 (editorial views) [Eckenhoff], 87  
 nitroprusside, metabolism in halothane-anesthetized and awake dogs [Behnia & others], 260  
 nitroprusside, total hip arthroplasty, blood loss and organ function after [Thompson & others], 91
- peridural  
 balanced, for cesarean section, neurologic activity of infants following [Hollmen & others], 350  
 epidural, catheter, double-orifice, hazard of subarachnoid anesthesia (clinical report) [Ward & others], 362  
 lumbar, emphysema, subcutaneous, following (clinical report) [Laman & McLeskey], 219  
 total spinal anesthesia during (correspondence) [Bullard & Woerth], 450  
 total spinal anesthesia during (correspondence) [DeVore], 449
- regional  
 brachial plexus block, heparin therapy and, hemopneumothorax complicating (clinical report) [Mani & others], 213  
 infraorbital nerve block, lidocaine-induced, epinephrine effects on duration [Fink & others], 263  
 obstetrical, fetal and neonatal effects of (review article) [Ralston & Shnider], 34  
 stellate ganglion block, ECG changes in evaluation of lateralization of sympathetic control of sinoatrial node (clinical report) [Rogers & others], 139
- spinal  
 epinephrine effects on duration of action of lidocaine [Fink & others], 263  
 lumbar puncture, headache following, treatment by epidural saline placement compared with epidural blood placement (clinical report) [Bart & Wheeler], 221  
 lumbar puncture, meningitis after spinal anesthesia (clinical report) [Berman & Eisele], 376  
 spinal cord response during (clinical report) [Forbes & Roizen], 440  
 total, during epidural anesthesia (correspondence) [Bullard & Woerth], 450  
 total, during epidural anesthesia (correspondence) [DeVore], 449
- Anesthetics  
 flammable, survey of use (correspondence) [Duncalf], 298
- gases  
 cyclopropane, malignant hyperthermia, *in-vitro* model, caffeine-induced contracture response to [Reed & Strobel], 254  
 cyclopropane, survey of flammable anesthetic use (correspondence) [Duncalf], 298  
 cylinders, see under Equipment, cylinders  
 ethylene, survey of flammable anesthetic use (correspondence) [Duncalf], 298  
 nitrous oxide, brain responses to in dog [Sakabe & others], 195  
 nitrous oxide, cardiovascular effects during enflurane anesthesia [Smith & others], 345  
 nitrous oxide, diffusion into tracheal tube cuffs, physical characteristics [Bernhard & others], 413  
 nitrous oxide, fetal neuropharmacology (editorial views) [Holtzman], 235  
 nitrous oxide, fetotoxicity in rats after chronic exposure [Pope & others], 11  
 nitrous oxide, malignant hyperthermia, *in-vitro* model, caffeine-induced contracture response to [Reed & Strobel], 254  
 nitrous oxide, metabolism, oxidative, in fetal rat brain during maternal anesthesia [Vannucci & Wolf], 238  
 nitrous oxide, myelography and, cerebrospinal fluid pressure and subarachnoid gas composition during (clinical report) [Prasertwanitch & Gabel], 214  
 nitrous oxide, potency, anesthetic indices relating to respiratory arrest and cardiac failure [Wolfson & others], 187  
 trace concentrations, fetotoxicity in rats following chronic exposure [Pope & others], 11
- intravenous  
 ketamine, acetylcholine concentrations and turnover in rat brain structures during [Ngai & others], 4  
 ketamine, angina and (correspondence) [Balagot], 156  
 ketamine, angina and (correspondence) [Cravlee], 155  
 ketamine, angina and (correspondence) [Guerra], 155  
 ketamine, pressure reversal in mice [Miller & Wilson], 104  
 ketamine, renin-angiotensin system regulatory function during [Miller & others], 399  
 ketamine, renin-dependent state in rat, blood pressure support during [Miller & others], 404  
 ketamine, vasoactive amine interactions with at normothermia and hypothermia in isolated rabbit heart [Hill & others], 315  
 pentobarbital, arrhythmia, epinephrine-induced, during, responses to fasting and lipid infusion [Miletich & others], 245  
 pentobarbital, fetal neuropharmacology (editorial views) [Holtzman], 235  
 pentobarbital, metabolism, oxidative, in fetal rat brain during maternal anesthesia [Vannucci & Wolf], 238  
 phenobarbital, metabolism of carbohydrate and amino acids in rat brain with [Chapman & others], 175  
 steroid, alaphadione, pressure reversal in mice [Miller & Wilson], 104  
 thiopental, history, use in military anesthesia (correspondence) [Cole], 79
- local  
 bupivacaine, dopamine release from rat striatal slices altered by [Westfall & others], 118  
 bupivacaine, seizure induced by in obstetrics (correspondence) [DeVore & Asrani], 386  
 chloroprocaine, echothiophate iodide effect on action (clinical report) [Brodsky & Campos], 288; 398  
 cocaine, dopamine release from rat striatal slices altered by [Westfall & others], 118  
 conduction block, frequency-dependent [Courtney & others], 111  
 lidocaine, blood preservation, erythrocyte and leukocyte responses to lidocaine in citrate-phosphate-dextrose solution (correspondence) [Abouleish & others], 295  
 lidocaine, dopamine release from rat striatal slices altered by [Westfall & others], 118  
 lidocaine, epinephrine effects on duration of action [Fink & others], 263  
 lidocaine, monoethylglycinexylidide and, uterine muscle responses to [Munson & Embro], 183  
 lidocaine, placental transfer, fetal acidosis effects on [Biehl & others], 409  
 nerve impulse pattern role in potency [Courtney & others], 111  
 obstetrical, fetal and neonatal effects of (review article) [Ralston & Shnider], 34  
 procaine, dopamine release from rat striatal slices altered by [Westfall & others], 118
- volatile  
 chloroform, malignant hyperthermia, *in-vitro* model, caffeine-induced contracture response to [Reed & Strobel], 254

- chloroform, toxicity, hepatic, isolated rat hepatocytes [Stacey & others], 17
- diethyl ether, charcoal, activated, adsorption of (correspondence) [Cundy], 77
- diethyl ether, charcoal, activated, adsorption of (correspondence) [Sircar & Kim], 78
- diethyl ether, endoplasmic reticulum, smooth, proliferation after [Ross & Cardell], 325
- diethyl ether, malignant hyperthermia, *in-vitro* model, caffeine-induced contracture response to [Reed & Strobel], 254
- diethyl ether, microsomal drug-metabolizing enzyme induction after [Ross & Cardell], 325
- diethyl ether, survey of flammable anesthetic use (correspondence) [Duncalf], 298
- enflurane, acetylcholine concentrations and turnover in rat brain structures during [Ngai & others], 4
- enflurane, malignant hyperthermia, *in-vitro* model, caffeine-induced contracture response to [Reed & Strobel], 254
- enflurane, nitrous oxide cardiovascular effects during [Smith & others], 345
- enflurane, potency, anesthetic indices relating to respiratory arrest and cardiac failure [Wolfson & others], 187
- enflurane, renin-angiotensin system regulatory function during [Miller & others], 399
- enflurane, renin-dependent state in rat, blood pressure support during [Miller & others], 404
- enflurane, toxicity, hepatic, isolated rat hepatocytes [Stacey & others], 17
- fluroxene, malignant hyperthermia, *in-vitro* model, caffeine-induced contracture response to [Reed & Strobel], 254
- fluroxene, renin-angiotensin system regulatory function during [Miller & others], 399
- fluroxene, survey of flammable anesthetic use (correspondence) [Duncalf], 298
- halothane, acetylcholine concentrations and turnover in rat brain structures during [Ngai & others], 4
- halothane, arrhythmia, epinephrine-induced, during, responses to fasting and lipid infusion [Miletich & others], 245
- halothane, dopamine release from rat striatal slices altered by [Westfall & others], 118
- halothane, endoplasmic reticulum, smooth, proliferation after [Ross & Cardell], 325
- halothane, fasting effects (editorial views) [Merin], 236
- halothane, fertility, reproduction, and postnatal survival in mice after chronic exposure [Wharton & others], 167
- halothane, fetal neuropharmacology (editorial views) [Holtzman], 235
- halothane, fetotoxicity in rats after chronic exposure [Pope & others], 11
- halothane, glucose uptake, cerebral, local, primates [Shapiro & others], 97
- halothane, hypotensive anesthesia for total hip arthroplasty, blood loss and organ function after [Thompson & others], 91
- halothane, hypovolemia and, interaction with hemodynamics of increased intra-abdominal pressure [Diamant & others], 23
- halothane, intra-abdominal pressure hemodynamic interaction with hypovolemia and [Diamant & others], 23
- halothane, left ventricular function during and in conscious man [Sonntag & others], 320
- halothane, malignant hyperthermia, *in-vitro* model, caffeine-induced contracture response to [Reed & Strobel], 254
- halothane, metabolism, oxidative, in fetal rat brain during maternal anesthesia [Vannucci & Wolf], 238
- halothane, metabolites artifactual? (correspondence) [Greene], 295
- halothane, metabolites artifactual? (correspondence) [Mukai & others], 296
- halothane, microsomal drug-metabolizing enzyme induction after [Ross & Cardell], 325
- halothane, nitroprusside metabolism in dogs during [Behnia & others], 260
- halothane, nitrous oxide cerebral effects in dog [Sakabe & others], 195
- halothane, norepinephrine during, microvascular responses to in rat [Yamaki & others], 332
- halothane, potency, anesthetic indices relating to respiratory arrest and cardiac failure [Wolfson & others], 187
- halothane, renin-angiotensin-aldosterone axis and (editorial views) [Pettinger], 393
- halothane, renin-angiotensin system regulatory function during [Miller & others], 399
- halothane, renin-dependent state in rat, blood pressure support during [Miller & others], 404
- halothane, toxicity, hepatic, isolated rat hepatocytes [Stacey & others], 17
- halothane, toxicity study (editorial views) [Van Dyke], 165
- halothane, toxicity study, reproduction in mice after chronic exposure [Wharton & others], 167
- halothane, vasopressin during, microvascular responses to in rat [Yamaki & others], 332
- isoflurane, malignant hyperthermia, *in-vitro* model, caffeine-induced contracture response to [Reed & Strobel], 254
- isoflurane, potency, anesthetic indices relating to respiratory arrest and cardiac failure [Wolfson & others], 187
- methoxyflurane, fetotoxicity in rats after chronic exposure [Pope & others], 11
- methoxyflurane, malignant hyperthermia, *in-vitro* model, caffeine-induced contracture response to [Reed & Strobel], 254
- methoxyflurane, potency, anesthetic indices relating to respiratory arrest and cardiac failure [Wolfson & others], 187
- methoxyflurane, toxicity, hepatic, isolated rat hepatocytes [Stacey & others], 17
- toxicity of halogenated in isolated rat hepatocytes [Stacey & others], 17
- trace concentrations, fetotoxicity in rats following chronic exposure [Pope & others], 11
- trace concentrations, halothane, toxicity study (editorial views) [Van Dyke], 165
- trace concentrations, halothane, toxicity study, reproduction in mice after chronic exposure [Wharton & others], 167
- Anesthetists, see under Anesthesiologists; Manpower
- Angina, see under Heart
- Angiotensin, see under Polypeptides; Polypeptides, renin-angiotensin
- Antagonists  
see also under Polypeptides
- narcotic
- naloxone, choledochoduodenal sphincter spasm associated with narcotic administration, reversal (clinical report) [McCammon & others], 437
- naloxone, myocardial function assessment after (correspondence) [Flacke & others], 384
- naloxone, myocardial function assessment after (correspondence) [Sprissler & O'Connor], 383
- neuromuscular relaxants
- edrophonium, alpha- and beta-bungarotoxin interactions with [Lee & others], 311
- edrophonium, bungarotoxin use in study of (editorial views) [Chang], 309
- neostigmine, antibiotic-induced paralysis of mouse phrenic nerve-hemidiaphragm preparation, reversal [Singh & others], 418
- Antiarrhythmics, see under Heart, arrhythmia
- Antibiotics
- aminoglycosides, paralysis of mouse phrenic nerve-hemidiaphragm preparation, and reversibility by calcium and by neostigmine [Singh & others], 418

- cephalosporins, paralysis of mouse phrenic nerve-hemidiaphragm preparation, and reversibility by calcium and by neostigmine [Singh & others], 418
- clindamycin, paralysis of mouse phrenic nerve-hemidiaphragm preparation, and reversibility by calcium and by neostigmine [Singh & others], 418
- erythromycin, paralysis of mouse phrenic nerve-hemidiaphragm preparation, and reversibility by calcium and by neostigmine [Singh & others], 418
- lincomycin, paralysis of mouse phrenic nerve-hemidiaphragm preparation, and reversibility by calcium and by neostigmine [Singh & others], 418
- penicillins, paralysis of mouse phrenic nerve-hemidiaphragm preparation, and reversibility by calcium and by neostigmine [Singh & others], 418
- polymyxins, paralysis of mouse phrenic nerve-hemidiaphragm preparation, and reversibility by calcium and by neostigmine [Singh & others], 418
- tetracyclines, paralysis of mouse phrenic nerve-hemidiaphragm preparation, and reversibility by calcium and by neostigmine [Singh & others], 418
- Anticholinesterase, see under Antagonists, neuromuscular relaxants; Enzymes, cholinesterase
- Anticholinergic, see under Premedication
- Anticoagulant, see under Blood
- Antidiuretic hormone, see under Hormones
- Anxiety, see under Psychologic responses
- AOKI, N., SHIMIZU, H., KUSHIYAMA, S., KATSUYA, H., and Isa, T., A new device for synchronized intermittent mandatory ventilation (clinical report), 69
- Apgar score, see under Anesthesia, obstetric
- Apparatus, see Equipment
- Arrhythmia, see under Heart
- Arteries
- arteriolar responses to norepinephrine and vasopressin during halothane in rat [Yamaki & others], 332
  - ductus arteriosus, prostaglandins, endogenous, role in pulmonary circulation (medical intelligence) [Weir & Grover], 201
  - prostaglandins, endogenous, role in pulmonary circulation (medical intelligence) [Weir & Grover], 201
  - radial, cannulation, wrist circumference predicts risk of occlusion after (clinical report) [Bedford], 377
- Arterioles, see under Arteries
- Arthroplasty, hip, see under Surgery, orthopedic, hip replacement
- Artificial ventilation, see Ventilation, mechanical
- Asepsis, see Sterilization
- ASHMEAD, G., see SHAPIRO, H. M., jt. auth.
- ASRANI, R., see DEVORE, J. S., jt. auth. (2)
- Atria, see under Heart
- Atropine, see under Parasympathetic nervous system; Premedication
- Audiovisual aid reviews, Parbrook, G. D., Parbrook, E. O., and Munk, I. B., *Audiotape Slide Programme on Clinical Physics and Measurements for the Anaesthetist* (review of audiovisual aids), 452
- Autonomic nervous system, see under Parasympathetic nervous system; Sympathetic nervous system
- Bacteremia, see under Infection
- BADEN, J. M., see WHARTON, R. S., jt. auth.
- BAEZ, S., see YAMAKI, T., jt. auth.
- Bain anesthetic circuit, see under Equipment, circuits
- BAKER, J. D., III, see WALLACE, C. T., jt. auth.
- BALAGOT, R. C., Ketamine and angina (correspondence), 156
- BALASARASWATHI, K., see LEVIN, M. J., jt. auth.
- BANCROFT, M. L., see FEELEY, T. W., jt. auth.
- BARAKA, A., Succinylcholine pretreatment unsatisfactory (correspondence), 298
- Barbiturates, see under Hypnotics
- BART, A. J., and WHEELER, A. S., Comparison of epidural saline placement and epidural blood placement in the treatment of post-lumbar-puncture headache (clinical report), 221
- BATEMAN, P. E., see POPE, W. D. B., jt. auth.
- BATTTT, G., see ROGERS, M. C., jt. auth.
- BECK, W. C., Sterilization of anesthetic apparatus (correspondence), 387
- BEDFORD, R. F., Wrist circumference predicts the risk of radial-arterial occlusion after cannulation (clinical report), 377
- BEHNIA, R., RAYMON, F., CHENG, S.-C., and SHARMAHD, S., Metabolism of sodium nitroprusside in dogs awake and anesthetized with halothane, 260
- BENNETT, E. J., see SALEM, M. R., jt. auth.
- Benson, R. C., *Handbook of Obstetrics & Gynecology* (book review), 234
- BENUMOF, J. L., see DIAMANT, M., jt. auth.
- , see WARD, C. F., jt. auth.
- BERMAN, R. S., and EISELE, J. H., Bacteremia, spinal anesthesia, and development of meningitis (clinical report), 376
- BERNHARD, W. N., YOST, L. C., TURNDORF, H., COTTRELL, J. E., and PAEGLE, R. D., Physical characteristics of and rates of nitrous oxide diffusion into tracheal tube cuffs, 413
- BERRY, F. A., JR., see MILLER, E. D., JR., jt. auth.
- Beta-adrenergic receptors, see under Sympathetic nervous system
- Beta-bungarotoxin, see under Neuromuscular relaxants
- BIHL, D., SHINDER, S. M., LEVINSON, G., and CALLENDER, K., Placental transfer of lidocaine: effects of fetal acidosis, 409
- Biosynthesis, see under Metabolism
- Biotransformation (drug)
- diethyl ether
    - microsomal drug-metabolizing enzyme induction after [Ross & Cardell], 325
    - smooth endoplasmic reticulum proliferation after [Ross & Cardell], 325
  - enzyme induction, microsomal, after diethyl ether or halothane [Ross & Cardell], 325
  - halothane
    - microsomal drug-metabolizing enzyme induction after [Ross & Cardell], 325
    - smooth endoplasmic reticulum proliferation after [Ross & Cardell], 325
  - metabolites, lidocaine, uterine muscle response to [Munson & Embro], 183
  - microsomes
    - enzyme induction after diethyl ether or halothane [Ross & Cardell], 325
    - metabolites of halothane artifactual? (correspondence) [Greene], 295
    - metabolites of halothane artifactual? (correspondence) [Mukai & others], 296
  - nitroprusside in dogs awake and anesthetized with halothane [Behnia & others], 260
  - pseudocholinesterase, abnormal, in surgical population (clinical report) [Oropollo], 284
- BIRCH, A. A., Cardiovascular vs. renal effects of dopamine (correspondence), 153
- Bite Blok, see under Equipment
- Blachly Bite Blok, see under Equipment, Bite Blok
- BLATNICK, R. A., see HILL, G. E., jt. auth.
- Blood
- anticoagulants
    - heparin and protamine, platelet aggregation following (laboratory report) [Ellison & others], 65
  - heparin therapy, brachial plexus block with followed by hemopneumothorax (clinical report) [Mani & others], 213
  - platelet aggregation after heparin and protamine (laboratory report) [Ellison & others], 65
  - coagulation, protamine, heparin and, platelet aggregation following (laboratory report) [Ellison & others], 65
  - erythrocytes, lidocaine effects on in citrate-phosphate-dextrose solution (correspondence) [Abouleish & others], 295
  - flow, see under individual organs

- leukocytes, lidocaine effects on in citrate-phosphate-dextrose solution (correspondence) [Abouleish & others], 295
- loss  
see also under Hemorrhage  
halothane and, interaction with hemodynamics of increased intra-abdominal pressure [Diamant & others], 23  
hypotensive anesthesia for total hip arthroplasty [Thompson & others], 91
- platelets  
heparin and protamine, aggregation following (laboratory report) [Ellison & others], 65  
protamine and heparin, aggregation following (laboratory report) [Ellison & others], 65
- preservation, see under Transfusion, stored blood  
pressure, see Blood pressure  
stored, see under Transfusion
- Blood-brain barrier, see under Solubility
- Blood pressure  
dysrhythmia, atrial, apparently trivial, having deleterious effects (clinical report) [Boba], 282  
hypertension, crisis following positive end-expiratory pressure (clinical report) [Kim & others], 365  
hypotension  
deliberate (editorial views) [Eckenhoff], 87  
dysrhythmia, atrial, causing (clinical report) [Boba], 282  
nitroprusside metabolism in dogs awake and anesthetized with halothane [Behnia & others], 260  
nodal rhythm causing (correspondence) [Ravindran], 229  
peripheral vascular resistance, nitrous oxide effect on during enflurane anesthesia in man [Smith & others], 345  
renin-angiotensin system regulatory function during general anesthesia [Miller & others], 399  
renin-dependent state in rat, blood pressure support during general anesthesia in [Miller & others], 404
- BOBA, A., Significant effects on the blood pressure of an apparently trivial atrial dysrhythmia (clinical report), 282
- Book reviews  
Alling, C. C., III, and Mahan, P. E. (eds.), *Facial Pain*, 234  
Benson, R. C., *Handbook of Obstetrics & Gynecology*, 234  
Cohen, E. N., and Van Dyke, R. A., *Metabolism of Volatile Anesthetics*, 162  
deJong, R. H., *Local Anesthetics*, 160  
Dorsch, J. A., and Dorsch, S. E., *Understanding Anesthesia Equipment: Construction, Care and Complications*, 452  
Dripps, R. D., Eckenhoff, J. E., and Vandam, L. D., *Introduction to Anesthesia: The Principles of Safe Practice*, 392  
Dunnhill, R. P. H., and Crawley, B. E., *Clinical and Resuscitative Data*, 234  
Dunphy, J. E., and Way, L. W., *Current Surgical Diagnosis and Treatment*, 304  
Ellis, H., and Feldman, S. (eds.), *Anatomy for Anaesthetists*, 391  
Gallagher, T. J., and Civetta, J. M., *Current Problems in Anesthesia and Critical Care Medicine*, volume 1, no. 1, 451  
Ganong, W. F., *The Nervous System*, 303  
Geevarghese, K. P., *Anesthesia for Neurological Surgery*, 390  
Giesecke, A. H., Jr., and Beyer, C. W., *Current Problems in Anesthesia and Critical Care Medicine*, volume 1, no. 2, 451  
Hamburg, J. (ed.), *Allied Health Education*: 2, 83  
Harper, H. A., Rodwell, V. W., and Mayes, P. A., (eds.), *Review of Physiological Chemistry*, 162  
Henschel, E. O. (ed.), *Malignant Hyperthermia: Current Concepts*, 391  
Jacox, A. K., *Pain: A Source Book for Nurses and Other Health Professionals*, 163  
Jenker, F. L., *Peripheral Nerve Block*, 302  
Kafer, E. R. (ed.), *Anesthesia and Respiratory Function*, 163  
Katz, A. M., *Physiology of the Heart*, 83  
Kerr, M., *Operative Obstetrics*, 234  
Kirby, R. R., *Current Problems in Anesthesia and Critical Care Medicine*, volume 1, no. 3, 451  
Klide, A. M., and Kung, S. H., *Veterinary Acupuncture*, 303  
Likhtenshtein, G. I., *Spin Labeling Methods in Molecular Biology*, 302
- Lipton, S. (ed.), *Persistent Pain: Modern Methods of Treatment*, 451  
Little, R. C., *Physiology of the Heart and Circulation*, 303  
MacDonnell, K. F., and Segal, M. S. (eds.), *Current Respiratory Care*, 304  
McCredie, J. A., *Basic Surgery*, 164  
Moir, D. D., *Obstetric Anaesthesia and Analgesia*, 161  
New, M. I., and Levine, L. S. (eds.), *Juvenile Hypertension*, 451  
Redding, J. S., *Life Support—The Essentials*, 162  
Roberts, R. B. (ed.), *Pulmonary Aspiration*, 163  
Sahs, A. L., Hartman, E. C., and Aronson, S. M., *Guidelines for Stroke Care*, 302  
Scranton, P. E., Jr., *Practical Techniques in Venipuncture*, 390  
Stefanis, C., Dornbush, R., and Fink, M. (eds.), *Hashish: Studies of Long-term Use*, 392  
Streilein, J. W., and Hughes, J. D., *Immunology. A Programmed Text*, 160  
Trissel, L. A., *Handbook on Injectable Drugs*, 391  
Vickers, M. D., *Medicine for Anaesthetists*, 390  
Wallace, J., *Blood Transfusion for the Clinicians*, 160  
Weiss, E. B., and Segal, M. S. (eds.), *Bronchial Asthma, Mechanisms and Therapeutics*, 82  
West, J. B., *Ventilation/Blood Flow and Gas Exchange*, 304
- Books received, 84, 305
- BOWDEN, M., Hazards of blind wiring of a facial fracture (correspondence), 79
- Brachial plexus block, see under Anesthetic techniques, regional
- Brain  
acetylcholine  
concentrations and turnover during anesthesia with halothane, enflurane, and ketamine [Ngai & others], 4  
metabolism, anesthetics and (editorial views) [Hanin], 1  
blood flow  
nitrous oxide effect on in dog [Sakabe & others], 195  
symposium, 8th International Cerebral Blood Flow Symposium (report of scientific meeting) [Shapiro], 231  
electroencephalography  
changes during anesthesia (correspondence) [Ravindran], 229  
changes during anesthesia (correspondence) [Tinker & Sharbrough], 230  
nitrous oxide effect on in dog [Sakabe & others], 195  
metabolism  
amino acids, phenobarbital effect on in rat [Chapman & others], 175  
carbohydrate, phenobarbital effect on in rat [Chapman & others], 175  
fetal, during maternal anesthesia (editorial views) [Holtzman], 235  
fetal, oxidative, during maternal anesthesia [Vannucci & Wolf], 238  
glucose uptake, local, halothane-anesthetized primates [Shapiro & others], 97  
oxygen consumption, nitrous oxide effect on in dog [Sakabe & others], 195  
pneumoencephalography, cerebrospinal fluid pressure and subarachnoid gas composition during anesthesia for gas myelography (clinical report) [Prasertwanitch & Gabel], 214  
vasomotor center, microvascular responses to norepinephrine and vasopressin during halothane in rat [Yamaki & others], 332
- BRODSKY, J. B., and CAMPOS, F. A., Chloroprocaine analgesia in a patient receiving echothiophate iodide eye drops (clinical report), 288; 398
- Bronchus, see under Lung
- BROOKS, J. L., JR., see MITCHELL, L. A., jt. auth.  
BROOKS, R. A., see FEELEY, T. W., jt. auth.  
BROWN, A. C. D., see KOPRIVA, C. J., jt. auth.  
BROWN, C. S., see WALLACE, C. T., jt. auth.  
BULLARD, J. R., and WOERTH, S. D., Total spinal anesthesia during epidural anesthesia (correspondence), 450  
Bungarotoxin, see under Neuromuscular relaxants  
Bupivacaine, see under Anesthetics, local

- BYERS, J. F., see WADIWA, R. K., jt. auth.  
 Bypass, cardiopulmonary, see under Surgery, cardiovascular
- Caffeine-induced contracture, see under Muscle, skeletal  
 Calcium, see under Ions  
 CALENDER, K., see BIEHL, D., jt. auth.  
 CALVERLEY, R. K., see SMITH, N. T., jt. auth.  
 CAMPOS, F. A., see BRODSKY, J. B., jt. auth.  
 Cannulation, see under Anatomy, specific vessels; Arteries; Lung, bronchus; Veins  
 CAPAN, L., see RAMANATHAN, S., jt. auth.  
 CARDELL, R. R., JR., see ROSS, W. T., JR., jt. auth.  
 Cardiac, see Heart  
 Cardiac arrest, see under Complications, arrest  
 Cardiac output, see under Heart  
 Cardiopulmonary bypass, see under Surgery, cardiovascular, bypass  
 Cardiovascular system, see under Arteries; Heart; Reflexes; Veins; individual organs  
 Catecholamines, see under Sympathetic nervous system  
 Catheter, see under Equipment  
 Catheterization, see under Anatomy, specific vessels; Arteries; Veins
- Cells  
 metabolism  
   hepatocytes, diethyl ether effects on [Ross & Cardell], 325  
   hepatocytes, halothane effects on [Ross & Cardell], 325  
 Central nervous system, see under Brain; Spinal cord  
 Cephalosporins, see under Antibiotics  
 Cerebral, see Brain  
 Cerebrospinal fluid  
   atropine, glycopyrrolate and, comparative penetration of blood-brain and placental barriers [Proakis & Harris], 339  
   gas tensions, nitrous oxide anesthesia for gas myelography (clinical report) [Prasertwanitch & Gabel], 214  
   glycopyrrolate, atropine and, comparative penetration of blood-brain and placental barriers [Proakis & Harris], 339  
   pressure  
     nitrous oxide anesthesia for gas myelography, response to (clinical report) [Prasertwanitch & Gabel], 214  
     nitrous oxide effect on in dog [Sakabe & others], 195  
 Cesarean section, see under Anesthesia, obstetric; Pregnancy; Surgery
- CHALON, J., PATEL, C., RAMANATHAN, S., and TURNDORE, H., Humidification of the circle absorber system (clinical report), 142  
 —, see RAMANATHAN, S., jt. auth.  
 CHIANG, C. C., Use of alpha- and beta-bungarotoxins for the study of neuromuscular transmission (editorial views), 309  
 CHAPMAN, A. G., NORDSTRÖM, C.-H., and SIESJÖ, B. K., Influence of phenobarbital anesthesia on carbohydrate and amino acid metabolism in rat brain, 175  
 CHENEY, D. L., see NGAI, S. H., jt. auth.  
 CHENG, S.-C., see BEHNIA, R., jt. auth.  
 Children, see under Age factors; Anesthesia, pediatric  
 $\alpha$ -Chloralose, see under Hypnotics  
 Chloroform, see under Anesthetics, volatile  
 Chloroprocaine, see under Anesthetics, local  
 Cholangiography, see under Liver, bile duct; Measurement techniques  
 Choledochoduodenal sphincter spasm, see under Complications, spasm, sphincter  
 Cholinergic function, see under Parasympathetic nervous system, acetylcholine  
 Cholinesterase, see under Enzymes  
 Circle absorber system, see under Equipment, circuits  
 Circuits, anesthetic, see under Equipment  
 Circulation, see under Arteries; Blood pressure; Heart; Reflexes; Veins; individual organs  
 Citric acid cycle, see under Metabolism  
 Clindamycin, see under Antibiotics
- Closing capacity, see under Lung, capacity  
 Coagulation, see under Blood  
 Cocaine, see under Anesthetics, local  
 COHEN, C. W., see KLEIN, S. L., jt. auth.  
 Cohen, E. N., and Van Dyke, R. A., *Metabolism of Volatile Anesthetics* (book review), 162  
 COHEN, E. N., see COURTNEY, K. R., jt. auth.  
 COLE, W. H. J., Fifty years of intravenous anesthesia (correspondence), 79  
 COLHOUN, E. H., and RYLETT, B. J., Further facts about neuromuscular blockades by nitrogen mustard and thio-tepa (correspondence), 381  
 COLLINS, V. J., see MANI, M., jt. auth.  
 COLMAN, R. W., see ELLISON, N., jt. auth.
- Complications  
   arrest, cardiac, double-orifice epidural catheter hazard (clinical report) [Ward & others], 362  
   cardiac arrest, double-orifice epidural catheter hazard (clinical report) [Ward & others], 362  
   convulsions, bupivacaine-induced seizure in obstetrics (correspondence) [DeVore & Asrani], 386  
   dental, edentulousness, Blachly Bite Blok for (clinical report) [Loehning], 364  
   Duchenne's muscular dystrophy, anesthesia-induced rhabdomyolysis in (clinical report) [Miller & others], 146  
   edema, uvular, following endotracheal intubation (clinical report) [Ravindran & Priddy], 374  
   embolism, see Embolism  
   emphysema, subcutaneous, supraclavicular, following lumbar epidural anesthesia (clinical report) [Laman & McLeskey], 219  
   fracture, skull, paternal, in obstetric anesthesia (correspondence) [DeVore & Asrani], 386  
   headache, post-spinal, epidural patch, saline placement compared with blood placement (clinical report) [Bart & Wheeler], 221  
   hematoma  
     from supraclavicular jugular-vein catheterization (correspondence) [Rao & others], 448  
     from supraclavicular jugular-vein catheterization (correspondence) [Schwartz], 448  
   hemopneumothorax following brachial plexus block and heparin therapy (clinical report) [Mani & others], 213  
   hemothorax  
     from supraclavicular jugular-vein catheterization (correspondence) [Rao & others], 448  
     from supraclavicular jugular-vein catheterization (correspondence) [Schwartz], 448  
   hypertension, crisis following positive end-expiratory pressure (clinical report) [Kim & others], 365  
   hyperthermia, see Hyperthermia  
   hypotension, deliberate (editorial views) [Eckenhoff], 87  
   meningitis after spinal anesthesia (clinical report) [Berman & Eisele], 376  
   muscular dystrophy, Duchenne's, anesthesia-induced rhabdomyolysis in (clinical report) [Miller & others], 146  
   myasthenia, neuromuscular block by nitrogen mustard and thio-tepa (correspondence) [Colhoun & Rylett], 381  
   obesity, morbid  
     pancuronium requirement increased by (clinical report) [Tsueda & others], 438  
     positive end-expiratory pressure effect on intraoperative arterial oxygenation in (clinical report) [Salem & others], 280  
   occlusion, radial-arterial after cannulation, wrist circumference predicts risk of (clinical report) [Bedford], 377  
   pneumonitis, acid, gastric fluid pH and volume responses to atropine, glycopyrrolate, and Riopan (clinical report) [Stoelting], 367  
   pneumothorax, hemopneumothorax following brachial plexus

- block and heparin therapy (clinical report) [Mani & others], 213
- spasm, sphincter, narcotic-associated, naloxone reversal (clinical report) [McCammon & others], 437
- thrombosis
- radial-arterial after cannulation, wrist circumference predicts risk of (clinical report) [Bedford], 377
  - Swan-Ganz catheters associated with (clinical report) [Hoar & others], 445
  - trauma, wiring, blind, of facial fracture, hazards (correspondence) [Bowden], 79
- Compressed gas cylinders, see under Equipment, cylinders, gas
- Conduction anesthesia, see under Anesthetic techniques, peridural; Anesthetic techniques, regional; Anesthetic techniques, spinal
- Conduction block, see under Nerve
- CONNER, J. T., Sedation vs. relief of anxiety (correspondence), 300
- Contractility, see under Heart; Muscle; Uterus
- Controlled ventilation, see under Ventilation
- Convulsion, see under Brain; Complications; Toxicity
- COOPER, J. B., Prevention of ventilator hazards (correspondence), 299
- Cord, spinal, see Spinal cord
- Coronary-artery disease, see under Heart
- COTEV, S., see PEREL, A., jt. auth.
- COTTELL, J. E., see BERNHARD, W. N., jt. auth.
- COURTNEY, K. R., KENDIG, J. J., and COHEN, E. N., Frequency-dependent conduction block: the role of nerve impulse pattern in local anesthetic potency, 111
- Critical volume theory, see under Theories of anesthesia
- Cuffs, see under Equipment
- CUNDY, J. M., Adsorption of ether by activated charcoal (correspondence), 77
- Curare, see Neuromuscular relaxants, *d*-Tubocurarine
- Cyanide, see under Toxicity
- Cyclopropane, see under Anesthetics, gases
- Cylinder, see under Equipment
- Cytochrome  $b_5$ , see under Biotransformation (drug); Enzymes; Liver, metabolism, microsomes
- Cytochrome c reductase, see under Enzymes
- Cytochrome  $P_{450}$ , see under Biotransformation (drug); Enzymes; Liver, metabolism, microsomes
- DALAL, F. Y., see SALEM, M. R., jt. auth.
- deJong, R. H., *Local Anesthetics* (book review), 160
- Deliberate hypertension, see Anesthetic techniques, hypotension, induced
- Dental anesthesia, see under Anesthesia
- Dermatomes, see under Spinal cord
- DEVEREUX, D. F., see KIM, Y. D., jt. auth.
- DEVORE, J. S., Total spinal anesthesia during epidural anesthesia (correspondence), 449
- , and ASRANI, R., Bupivacaine-induced seizure in obstetrics (correspondence), 386
- , and ASRANI, R., Paternal fractured skull as a complication of obstetric anesthesia (correspondence), 386
- DIAMANT, M., BENUMOF, J. L., and SAIDMAN, L. J., Hemodynamics of increased intra-abdominal pressure: interaction with hypovolemia and halothane anesthesia, 23
- Diethyl ether, see under Anesthetics, volatile
- DiFAZIO, C. A., see WESTFALL, T. C., jt. auth.
- Dimethyl-4-phenylpiperazine, see Neuromuscular transmission, nicotinic agonist, DMPP
- Dimethyltubocurarine, see Neuromuscular relaxants, metocurine
- DMPP, see under Neuromuscular transmission, nicotinic agonist
- DONATH, U., see SONNTAG, H., jt. auth.
- DOOLEY, J. R., see WHARTON, R. S., jt. auth.
- Dopamine, see under Heart; Sympathetic nervous system
- Doppler ultrasound, see under Measurement techniques
- Dorsch, J. A., and Dorsch, S. E., *Understanding Anesthesia Equipment: Construction, Care and Complications* (book review), 452
- Double-orifice epidural catheter, see under Equipment, catheters, epidural
- DOWNES, J. J., JR., Internal vs. external diameter of pediatric endotracheal tubes (correspondence), 157
- , see SCHWARTZ, A. J., jt. auth.
- Drapes, see under Equipment
- Dripps, R. D., Eckenhoff, J. E., and Vandam, L. D., *Introduction to Anesthesia: The Principles of Safe Practice* (book review), 392
- DRYDEN, G. E., see McCAMMON, R. L., jt. auth.
- Duchenne's muscular dystrophy, see under Complications, muscular dystrophy
- Ductus arteriosus, see under Arteries
- DU MOULIN, G. C., and SAUBERMANN, A. J., Sterilization of anesthetic apparatus (correspondence), 389
- DUNCALE, D., Survey of the use of flammable anesthetics (correspondence), 298
- Dunnhill, R. P. H., and Crawley, B. E., *Clinical and Resuscitative Data* (book review), 234
- Dunphy, J. E., and Way, L. W., *Current Surgical Diagnosis and Treatment* (book review), 304
- Dysrhythmia, see Heart, arrhythmia
- Dystrophy, muscular, see under Complications, muscular; Muscle, skeletal
- Echothiophate iodide, see under Enzymes, cholinesterase, anticholinesterases
- ECKENHOFF, J. E., A wide-angle view of anesthesiology: Emory A. Rovenstine Memorial Lecture (special article), 272
- , Deliberate hypotension (editorial views), 87
- Edema, see under Complications
- Edentulousness, see under Complications, dental
- EDIE, R. N., see HOAR, P. F., jt. auth.
- EDMUNDS, L. H., JR., see ELLISON, N., jt. auth.
- Edrophonium, see under Antagonists, neuromuscular relaxants
- Education
- acquisition and use of new medical knowledge (editorial views) [Warner], 396
  - acquisition and use of new medical knowledge (special article) [Fineberg & others], 430
  - anesthesiologists (special article) [Eckenhoff], 272
  - residents, competence, how faculty members define [Orkin & Greenhow], 267
- EGER, E. I., II, see SMITH, N. T., jt. auth.
- EISELE, J. H., see BERMAN, R. S., jt. auth.
- , see WYMORE, M. L., jt. auth.
- Electrical systems
- explosions, survey of flammable anesthetic use (correspondence) [Duncalf], 298
  - fire, survey of flammable anesthetic use (correspondence) [Duncalf], 298
- Electrocardiography, see under Heart; Monitoring
- Electroencephalography, see under Brain; Monitoring
- ELLIS, H., and FELDMAN, S. (eds.), *Anatomy for Anaesthetists* (book review), 391
- ELLISON, N., EDMUNDS, L. H., JR., and COLMAN, R. W., Platelet aggregation following heparin and protamine administration (laboratory report), 65
- Embolism
- air, venous, monitoring methods compared in supine dogs [English & others], 425
  - gas, during laparoscopy (clinical report) [Wadhwa & others], 74
- EMBRO, W. J., see MUNSON, E. S., jt. auth.
- Emphysema, see under Complications
- Endobronchial tube, see under Equipment, tubes
- Endotracheal intubation, see under Intubation
- Endotracheal tube, see under Equipment, tubes
- Endotracheal tube cuffs, see under Equipment, cuffs
- Enflurane, see under Anesthetics, volatile
- ENGLISH, J. B., WESTENSKOW, D., HODGES, M. R., and STANLEY, T. H., Comparison of venous air embolism monitoring methods in supine dogs, 425

## Enzymes

- cholinesterase, anticholinesterases, echothiophate iodide, chloro-procaine analgesia in patient being treated with (clinical report) [Brodsky & Campos], 288; 398
- cytochrome  $b_5$ , induction after diethyl ether or halothane [Ross & Cardell], 325
- cytochrome c reductase, NADPH, responses to halothane and diethyl ether [Ross & Cardell], 325
- cytochrome  $P_{450}$ , induction after diethyl ether or halothane [Ross & Cardell], 325
- induction, see under Biotransformation (drug); Induction pseudocholinesterase, abnormal, in surgical population (clinical report) [Oropollo], 284

Epidural anesthesia, see Anesthetic techniques, peridural

Epidural catheter, see under Equipment, catheters

Epidural patch, see under Complications, headache, postspinal

Epinephrine, see under Heart, arrhythmia; Sympathetic nervous system; Sympathetic nervous system, catecholamines

EPSTEIN, R. M., see MILLER, E. D., JR., jr. auth.

## Equipment

- see also under Carbon dioxide, absorption; Measurement techniques, electrodes; Sterilization
- airway, mouthpiece, Blachly Bite Blok for edentulous patients (clinical report) [Loehning], 364
- anesthesia machines, failsafe system, lack of safety (correspondence) [Levin & Balasarawathi], 152
- Bite Blok, Blachly, for edentulous patients (clinical report) [Loehning], 364
- catheters
  - arterial, wrist circumference predicts risk of occlusion after cannulation (clinical report) [Bedford], 377
  - epidural, double-orifice, hazard of subarachnoid anesthesia (clinical report) [Ward & others], 362
  - pulmonary-artery, sterility, maintenance during manipulation after placement (clinical report) [Kopman & Sandza], 373
  - Swan-Ganz, sterility, maintenance during manipulation after placement (clinical report) [Kopman & Sandza], 373
  - Swan-Ganz, thrombogenesis associated with (clinical report) [Hoar & others], 445
  - venous, intracardiac unnecessary in neurosurgical anesthesia (correspondence) [Jackson], 154
- circle absorber system, see under Equipment, circuits
- circuits
  - Bain, semi-open, controlled ventilation of children with, new concept in [Rayburn & Graves], 250
  - circle absorber system, humidifier (clinical reports) [Chalon & others], 142
- cuffs, endotracheal tube, nitrous oxide diffusion into, physical characteristics [Bernhard & others], 413
- cylinders, gas, compressed, hazards (clinical report) [Feeley & others], 72
- drapes, surgical
  - hyperthermia, benign, in children, prevention (clinical report) [Fraser], 375
  - ophthalmic, minienvironmental control under (clinical report) [Ramanathan & others], 286
- exhaust systems, see also Equipment, scavengers
- failsafe, lack of safety (correspondence) [Levin & Balasarawathi], 152
- gas cylinders, see under Equipment, cylinders
- humidifiers
  - circle absorber system (clinical report) [Chalon & others], 142
  - heated humidification for infants during anesthesia (correspondence) [Wallace & others], 80
- pipelines, gas, medical, hospital installations, standards (correspondence) [Hedley-Whyte], 383
- pipings, gas, Canadian standards for (correspondence) [Fair], 155
- scavengers
  - see also Equipment, exhaust systems
  - diethyl ether adsorption by activated charcoal (correspondence) [Cundy], 77

diethyl ether adsorption by activated charcoal (correspondence) [Sircar & Kim], 78

sterilization, see under Sterilization

stethoscopes, esophageal

safe use (correspondence) [McLaughlin], 382

safe use (correspondence) [Schwartz & Downes], 382

tubes

endobronchial, modification (correspondence) [Zukaitis & Koehler], 152

endotracheal, pediatric, size marking, internal vs. external diameter (correspondence) [Downes], 157

endotracheal, pediatric, size marking, internal vs. external diameter (correspondence) [Morley], 157

valves

selector, hazard prevention (correspondence) [Cooper], 299

selector, hazard prevention (correspondence) [Parker], 300

selector, hazard prevention (correspondence) [Sears], 300

ventilators

hyperventilation accidentally induced by (clinical report) [Waterman & others], 141

intermittent mandatory ventilation, synchronized, device for (clinical report) [Aoki & others], 69

mechanical inspiratory peak flow as determinant of tidal volume (clinical report) [Perel & others], 290

selector valve hazard, prevention (correspondence) [Cooper], 299

selector valve hazard, prevention (correspondence) [Parker], 300

selector valve hazard, prevention (correspondence) [Sears], 300

Erratum, 398

Erythrocyte, see under Blood

Erythrocyte membrane, see under Membrane

Erythromycin, see under Antibiotics

Esophageal stethoscope, see under Equipment, stethoscopes

Ether, see under Anesthetics, volatile, individual ethers

Ethylene, see under Anesthetics, gases

Exhaust system, see under Equipment

Explosions, flammable anesthetic use survey (correspondence) [Duncalf], 298

Eyes

intraocular pressure, succinylcholine-induced increase not inhibited by nondepolarizing neuromuscular blockers (clinical report) [Meyers & others], 149

surgery, see Surgery, ophthalmic

Facial surgery, see under Surgery, maxillofacial

Failsafe equipment, see under Equipment

FAIR, J. L., Canadian standards for piped gases (correspondence), 155

Fasting, see under Metabolism

FEELEY, T. W., BANCROFT, M. L., BROOKS, R. A., and HEDLEY-WHYTE, J., Potential hazards of compressed gas cylinders: a review (clinical report), 72

FELDMAN, S. M., see YAMAKI, T., jr. auth.

Fentanyl, see under Analgesics, narcotic; Anesthetics, intravenous

Fertility, halothane chronic exposure effects on in mice [Wharton & others], 167

Fetotoxicity, see Toxicity, fetal, teratogenicity

Fetus, see under Anesthesia, obstetric; Measurement techniques; Placenta; Pregnancy; Toxicity; Uterus

FINCK, A. D., see NGAI, S. H., jr. auth.

FINEBERG, H. V., GABEL, R. A., and SOSMAN, M. B., Acquisition and application of new medical knowledge by anesthesiologists: three recent examples (special article), 430

FINK, B. R., AASHEIM, G. M., and LEVY, B. A., Neural pharmacokinetics of epinephrine, 263

Fire, see under Electrical systems; Explosions

FLACKE, J. W., FLACKE, W. E., and WILLIAMS, G. D., Evaluation of left ventricular function (correspondence), 383

FLACKE, W. E., see FLACKE, J. W., jr. auth.



- Flammable anesthetics, see under Anesthetics; Explosions  
Fluroxene, see under Anesthetics, volatile  
FORBES, A. R., and ROIZEN, M. F., Does spinal anesthesia anesthetize the spinal cord? (clinical report), 440  
Fracture, see under Complications  
FRASER, J. G., Iatrogenic benign hyperthermia in children (clinical report), 375  
Frequency-dependent conduction block, see under Nerve, conduction block  
FUJII, K., see MUKAI, S., jt. auth.  
Functional residual capacity, see under Lung  
  
GABEL, R. A., see FINEBERG, H. V., jt. auth.  
—, see PRASERTWANITCH, Y., jt. auth.  
Gallagher, T. J., and Civetta, J. M., *Current Problems in Anesthesia and Critical Care Medicine*, volume 1, no. 1 (book review), 451  
Gallamine, see under Neuromuscular relaxants  
Ganong, W. F., *The Nervous System* (book review), 303  
Gas, see under Anesthetics; Anesthetics, volatile; Carbon dioxide; Gases, nonanesthetic; Oxygen; Physics  
Gas, anesthetic, see under Anesthetics  
Gas embolism, see under Embolism  
Gas lines, see under Equipment, pipelines  
Gas myelography, see under Spinal cord, myelography  
Gases, nonanesthetic  
    cylinders, see under Equipment, cylinders  
    nitrogen, intra-abdominal pressure, increased, hemodynamics, interaction with hypovolemia and halothane anesthesia [Diamant & others], 23  
    piping, see under Equipment, piping  
Gastric, see Gastrointestinal tract  
Gastrointestinal tract, stomach, gastric fluid pH and volume responses to atropine, glycopyrrolate, and Riopan (clinical report) [Stoelting], 367  
Geevarghese, K. P., *Anesthesia for Neurological Surgery* (book review), 390  
Giesecke, A. H., Jr., and Beyer, C. W., *Current Problems in Anesthesia and Critical Care Medicine*, volume 1, no. 2 (book review), 451  
Glucose, see under Blood; Metabolism  
Glycopyrrolate, see under Premedication  
GOOTMAN, P. M., see YAMAKI, T., jt. auth.  
GRAVES, S. A., see RAYBURN, R. L., jt. auth.  
GRAVLEE, G. P., Ketamine and angina (correspondence), 155  
GREENBERG, J. H., see SHAPIRO, H. M., jt. auth.  
GREENE, N. M., Artifactual metabolites of halothane? (correspondence), 295  
GREENHOW, D. E., see ORKIN, F. K., jt. auth.  
GROVER, R. F., see WEIR, E. K., jt. auth.  
GUERRA, F., Ketamine and angina (correspondence), 155  
  
HALL, R. C., see STACEY, N. H., jt. auth.  
Halothane, see under Anesthetics, volatile  
HALSEY, M. J., see POPE, W. D. B., jt. auth.  
Hamburg, J. (ed.), *Allied Health Education: 2* (book review), 83  
HANAKI, C., see MUKAI, S., jt. auth.  
HANIN, I., Anesthetics and central cholinergic function—a perspective (editorial views), 1  
Harper, H. A., Rodwell, V. W., and Mayes, P. A., (eds.), *Review of Physiological Chemistry* (book review), 162  
HARRIS, G. B., see PROAKIS, A. G., jt. auth.  
HARVEY, A. L., see SINGH, Y. N., jt. auth.  
Headache, see under Complications  
Heart  
    angina  
        ketamine and (correspondence) [Balagot], 156  
        ketamine and (correspondence) [Gravlee], 155  
        ketamine and (correspondence) [Guerra], 155  
    arrhythmia  
        antiarrhythmics, frequency-dependent conduction block [Courtney & others], 111  
        antiarrhythmics, local anesthetic potency, nerve impulse pattern role in [Courtney & others], 111  
        blood pressure disturbance caused by apparently trivial atrial dysrhythmia (clinical report) [Boba], 282  
        epinephrine-induced, fasting effect on (editorial views) [Merin], 236  
        epinephrine-induced, fasting and lipid infusion effects on during halothane anesthesia [Miletich & others], 245  
        fasting effects (editorial views) [Merin], 236  
        hypotension from nodal rhythm (correspondence) [Ravindran], 229  
        tachycardia, anesthesia-induced rhabdomyolysis in Duchenne's muscular dystrophy (clinical report) [Miller & others], 146  
        tachycardia, hypertension and following positive end-expiratory pressure (clinical report) [Kim & others], 365  
        Wolff-Parkinson-White syndrome during anesthesia (clinical report) [van der Starre], 369  
    atria, neuromuscular blocking agent vagolytic action at pacemaker [Lee Son & Waud], 191  
    cardiac output  
        halothane effect on left ventricular function in man [Sonntag & others], 320  
        hypovolemia and halothane interaction with hemodynamics of increased intra-abdominal pressure [Diamant & others], 23  
        nitrous oxide effect on during enflurane anesthesia [Smith & others], 345  
    contractility  
        halothane effect on left ventricular function in man [Sonntag & others], 320  
        nitrous oxide effect on during anesthesia [Smith & others], 345  
    coronary-artery disease, propranolol effect on hemodynamics during general anesthesia [Kopriva & others], 28  
    electrocardiography, atrial dysrhythmia, apparently trivial, causing serious disturbance of blood pressure (clinical report) [Boba], 282  
    epinephrine, fasting effect on arrhythmias (editorial views) [Merin], 236  
    metabolism  
        fasting effect on epinephrine-induced arrhythmia (editorial views) [Merin], 236  
        fasting and lipid infusion effects on epinephrine-induced arrhythmia during halothane anesthesia [Miletich & others], 245  
    myocardial function  
        halothane effect on left ventricular function in man [Sonntag & others], 320  
        ketamine potentiation of vasoactive amines [Hill & others], 315  
        left ventricular function assessment after naloxone (correspondence) [Flacke & others], 384  
        left ventricular function assessment after naloxone (correspondence) [Sprissler & O'Connor], 383  
        nitrous oxide effect on during enflurane anesthesia [Smith & others], 345  
    myocardium, revascularization, propranolol effect on hemodynamics during general anesthesia [Kopriva & others], 28  
    propranolol, hemodynamics during general anesthesia in patients receiving [Kopriva & others], 28  
    pulse rate, sympathetic control of sinoatrial node, lateralization of (clinical report) [Rogers & others], 139  
    sinoatrial node, sympathetic control, lateralization of (clinical report) [Rogers & others], 139  
    vascular pressures, halothane effect on left ventricular function in man [Sonntag & others], 320  
    ventricle, left, halothane effect on function in conscious man [Sonntag & others], 320  
HEDLEY-WHITE, J., Medical gas line installations in hospitals (correspondence), 383  
—, see FEELEY, T. W., jt. auth.  
Hematoma, see under Complications

- Hemopneumothorax, see under Complications
- Hemorrhage, halothane and, interaction with hemodynamics of increased intra-abdominal pressure [Diamant & others], 23
- Hemothorax, see under Complications
- Henschel, E. O. (ed.), *Malignant Hyperthermia: Current Concepts* (book review), 391
- Heparin, see under Blood, anticoagulants; Blood, coagulation
- Hepatic, see Liver
- Hepatotoxicity, see under Liver; Toxicity
- HETRICK, W. D., see WOLFSON, B., jt. auth.
- HILL, G. E., WONG, K. C., SHAW, C. L., SENTKER, C. R., and BLATNICK, R. A., Interactions of ketamine with vasoactive amines at normothermia and hypothermia in the isolated rabbit heart, 315
- HILLEBRAND, W., see SONNTAG, H., jt. auth.
- Hip replacement, see under Surgery, orthopedic
- History, anesthesiology (special article) [Eckenhoff], 272
- HITT, B. A., see WHARTON, R. S., jt. auth.
- HOAR, P. F., STONE, J. G., WICKS, A. E., EDIE, R. N., and SCHOLES, J. V., Thrombogenesis associated with Swan-Ganz catheters (clinical report), 445
- HODGES, M. R., see ENGLISH, J. B., jt. auth.
- HOHMANN, J. E., Succinylcholine pretreatment unsatisfactory (correspondence), 297
- HOLLMEN, A. I., JOUPILA, R., KOIVISTO, M., MAATTA, L., PIHLAJANIEMI, R., PUUKKA, M., and RANTAKYLA, P., Neurologic activity of infants following anesthesia for cesarean section, 350
- HOLTZMAN, S. D., Maternal anesthesia and fetal neuropharmacology (editorial views), 235
- Hormones  
antidiuretic, vasopressin, microvascular response to during halothane in rat [Yamaki & others], 332  
prostaglandins, endogenous, role in pulmonary circulation (medical intelligence) [Weir & Grover], 201
- Horner's syndrome, see under Sympathetic nervous system entries for stellate ganglion
- HULL, M. T., MULLER, J., and ALBRECHT, W. H., Morphologic abnormalities in a case of malignant hyperthermia (clinical report), 223
- Humidification  
see also under Equipment; Operating rooms  
circle absorber system (clinical report) [Chalon & others], 142  
heated, infants during anesthesia (correspondence) [Wallace & others], 80  
ophthalmic surgery, minienvironmental control under drapes (clinical report) [Ramanathan & others], 286
- Humidifier, see under Equipment
- Hyperbaria, reversal of anesthesia in mice [Miller & Wilson], 104
- Hypertension, see under Blood pressure; Complications
- Hyperthermia  
inadvertent  
benign, in children (clinical report) [Fraser], 375  
malignant pyrexia, benign iatrogenic hyperthermia in children (clinical report) [Fraser], 375  
morphologic abnormalities in (clinical report) [Hull & others], 223  
malignant pyrexia  
caffeine-induced contracture in *in-vitro* model, differential effects of inhalational anesthetics [Reed & Strobel], 254  
morphologic abnormalities in (clinical report) [Hull & others], 223
- Hyperventilation, see under Acid-base equilibrium, alkalosis, respiratory; Anesthesia, depth; Brain, blood flow; Carbon dioxide, hypocarbia; Cerebrospinal fluid, pressure; Heart, cardiac output; Ventilation
- Hypnotics  
barbiturates  
phenobarbital, metabolism of carbohydrate and amino acids in rat brain with [Chapman & others], 175  
phenobarbital, pressure reversal in mice [Miller & Wilson], 104  
 $\alpha$ -chloralose, pressure reversal in mice [Miller & Wilson], 104  
sedatives, premedication, sedation vs. relief of anxiety (correspondence) [Conner], 300  
urethane, pressure reversal in mice [Miller & Wilson], 104
- Hypotension, see under Anesthetic techniques; Blood pressure; Complications; Position; Shock
- Hypothermia  
see also under Anesthetic techniques; Temperature  
ketamine interactions with vasoactive amines, compared with normothermia [Hill & others], 315
- Hypovolemia, see under Blood, loss; Blood, volume; Hemorrhage
- IMV, see Ventilation, intermittent mandatory
- Inadvertent hyperthermia, see under Hyperthermia
- Indices, anesthetic potency, see under Potency, anesthetic
- Induced hypotension, see under Anesthetic techniques, hypotension
- Induction, enzymes, microsomal, after diethyl ether or halothane [Ross & Cardell], 325
- Infants, see under Anesthesia, obstetric; Anesthesia, pediatric
- Infection  
bacteremia  
meningitis after spinal anesthesia (clinical report) [Berman & Eisele], 376  
pulmonary-artery catheter, maintenance of sterility after placement (clinical report) [Kopman & Sandza], 373
- Infiltration anesthesia, see under Anesthetic techniques, regional
- Inhalation anesthesia, see under Anesthetics, gases; Anesthetics, volatile; Induction; Pharmacokinetics
- INOUE, S., see SAKABE, T., jt. auth.
- Inspiratory pressure, see under Ventilation
- Interactions (drug)  
see also Antagonists, narcotic; Antagonists, neuromuscular relaxants; Pharmacology  
echothiophate iodide-chloroprocaine (clinical report) [Brodsky & Campos], 288; 398  
epinephrine-lidocaine [Fink & others], 263  
halothane-norepinephrine in rat microvasculature [Yamaki & others], 332  
halothane-vasopressin in rat microvasculature [Yamaki & others], 332  
nitrous oxide-enflurane, cardiovascular effects [Smith & others], 345
- Intermittent mandatory ventilation, see under Ventilation
- Intermolecular interactions, polar, see under Theories of anesthesia, polar
- Intra-abdominal pressure, see under Abdomen
- Intraocular pressure, see under Eyes
- Intravenous anesthetics, see under Anesthetics
- Intubation, endotracheal, complications, uvular edema (clinical report) [Ravindran & Priddy], 374
- Ions  
calcium, antibiotic-induced paralysis of mouse phrenic nerve-hemidiaphragm preparation, reversal [Singh & others], 418  
magnesium, aminoglycoside-induced paralysis of mouse phrenic nerve-hemidiaphragm preparation, and reversibility by calcium and by neostigmine [Singh & others], 418  
sodium, depletion, renin-dependent state in rat, blood pressure support during general anesthesia [Miller & others], 404
- ISA, T., see AOKI, N., jt. auth.
- Isoflurane, see under Anesthetics, volatile
- Isoproterenol, see under Heart; Sympathetic nervous system, sympathomimetic agents
- JACKSON, P. L., Intracardiac catheters unnecessary in neurosurgical anesthesia (correspondence), 154
- JACOBS, H. K., see SALEM, M. R., jt. auth. (2)
- JACOX, A. K., *Pain: A Source Book for Nurses and Other Health Professionals* (book review), 163
- Jejunioileal bypass, see under Surgery
- Jenker, F. L., *Peripheral Nerve Block* (book review), 302
- JOHNSON, M., see MEYERS, E. F., jt. auth.
- JONES, C. W., see SMITH, N. T., jt. auth.
- JOUPILA, R., see HOLLMEN, A. I., jt. auth.

- Kafer, E. R. (ed.), *Anesthesia and Respiratory Function* (book review), 163
- KATSUYA, H., see AOKI, N., jt. auth.
- Katz, A. M., *Physiology of the Heart* (book review), 83
- KATZ, D. L., see WADHWA, R. K., jt. auth.
- KATZ, R. L., see LEE, C., jt. auth.
- KENDIG, J. J., see COURTNEY, K. R., jt. auth.
- Kerr, M., *Operative Obstetrics* (book review), 234
- Ketamine, see under Anesthetics, intravenous
- Kidney  
blood flow  
dopamine cardiovascular vs. renal effects (correspondence) [Birch], 153  
dopamine cardiovascular vs. renal effects (correspondence) [Zimmerman], 153
- KIM, B. M., see SIRCAR, S., jt. auth.
- KIM, Y. D., DEVEREUX, D. F., and MACNAMARA, T. E., An unusual cardiovascular response to PEEP (clinical report), 365
- Kirby, R. R., *Current Problems in Anesthesia and Critical Care Medicine*, volume 1, no. 3 (book review), 451
- KLEIN, G. S., see RAMANATHAN, S., jt. auth.
- KLEIN, S. L., WOLLMAN, H., and COHEN, C. W., General anesthesia by dentists unacceptable (correspondence), 385
- Klide, A. M., and Kung, S. H., *Veterinary Acupuncture* (book review), 303
- KLIONSKY, B. L., see ABOULEISH, E., jt. auth.
- KOEHLER, L. S., see ZUKAITIS, M. G., jt. auth.
- KOIVISTO, M., see HOLLMEN, A. I., jt. auth.
- KOPMAN, E. A., and SANDZA, J. G., JR., Manipulation of the pulmonary-artery catheter after placement: Maintenance of sterility (clinical report), 373
- KOPRIVA, C. J., BROWN, A. C. D., and PAPPAS, G., Hemodynamics during general anesthesia in patients receiving propranolol, 28
- KRUPIN, T., see MEYERS, E. F., jt. auth.
- KURAMOTO, T., see SAKABE, T., jt. auth.
- KUSHIYAMA, S., see AOKI, N., jt. auth.
- LAKE, C. L., see WOLFSON, B., jt. auth.
- LANAN, E. N., and MCLLESKEY, C. H., Supraclavicular subcutaneous emphysema following lumbar epidural anesthesia (clinical report), 219
- LANSDOWN, A. B. G., see POPE, W. D. B., jt. auth.
- Laparoscopy, see under Surgery
- LEE, C., YANG, E., and KATZ, R. L., Interactions of neuromuscular effects of edrophonium, alpha-bungarotoxin, and beta-bungarotoxin, 311
- LEE SON, S., and WAUD, D. R., A vagolytic action of neuromuscular blocking agents at the pacemaker of the isolated guinea pig atrium, 191
- Leukocyte, see under Blood
- LEVIN, M. J., and BALASARASWATHI, K., "Fail safe"? Unsafe! (correspondence), 152
- LEVINSON, G., see BIEHL, D., jt. auth.
- LEVY, B. A., see FINK, B. R., jt. auth.
- Lidocaine, see under Anesthetics, local; Heart, arrhythmia
- Likhtenshtein, G. I., *Spin Labeling Methods in Molecular Biology* (book review), 302
- Lincomycin, see under Antibiotics
- Lipton, S. (ed.), *Persistent Pain: Modern Methods of Treatment* (book review), 451
- Little, R. C., *Physiology of the Heart and Circulation* (book review), 303
- Liver  
bile duct, cholangiography, narcotic-induced choledochoduodenal sphincter spasm, naloxone reversal (clinical report) [McCammon & others], 437  
hepatotoxicity, volatile anesthetics, halogenated, in isolated rat hepatocytes [Stacey & others], 17  
metabolism  
microsomal drug-metabolizing enzymes, induction after diethyl ether or halothane [Ross and Cardell], 325  
smooth endoplasmic reticulum, proliferation after diethyl ether or halothane [Ross & Cardell], 325  
ultrastructure, halothane and diethyl ether effects on [Ross & Cardell], 325
- Local anesthetics, see under Anesthetic techniques, regional; Anesthetic techniques, peridural; Anesthetic techniques, spinal; Anesthetics
- LOEHNING, R. W., Blachly Bite Blok for edentulous patients (clinical report), 364
- LONGNECKER, D. E., see MILLER, E. D., JR., jt. auth.
- Lumbar epidural anesthesia, see under Anesthetic techniques, peridural
- Lumbar puncture, see under Anesthetic techniques, spinal
- Lung  
blood flow, prostaglandins, role of (medical intelligence) [Weir & Grover], 201  
bronchus  
cannulation, suctioning techniques, selective, used for infants and children evaluated (clinical report) [Salem & others], 379  
suctioning, selective, evaluation of techniques used for infants and children (clinical report) [Salem & others], 379  
capacity  
closing, airway closure, anesthesia and (correspondence) [Wahba], 293  
vital, estimation (correspondence) [Zamora], 79  
functional residual capacity, airway closure and anesthesia (correspondence) [Wahba], 293  
tidal volume, mechanical inspiratory peak flow as determinant during intermittent mandatory ventilation and positive end-expiratory pressure (clinical report) [Perel & others], 290  
trachea, suctioning, selective, evaluation of techniques used for infants and children (clinical report) [Salem & others], 379  
vascular resistance, prostaglandins, endogenous, role in pulmonary circulation (medical intelligence) [Weir & Grover], 201  
vasculature, prostaglandins, role in pulmonary circulation (medical intelligence) [Weir & Grover], 201  
vital capacity, see under Lung, capacity
- MAATTA, L., see HOLLMEN, A. I., jt. auth.
- MacDonnell, K. F., and Segal, M. S. (eds.), *Current Respiratory Care* (book review), 304
- MACNAMARA, T. E., see KIM, Y. D., jt. auth.
- Magnesium, see under Ions
- Malignant pyrexia, see under Hyperthermia
- MANI, M., RAMAMURTHY, N., RAO, T. L. K., WINNIE, A. P., and COLLINS, V. J., An unusual complication of brachial plexus block and heparin therapy (clinical report), 213
- Manpower  
anesthesiologist distribution (special article) [Eckenhoff], 272  
anesthesiologists  
surgical care needs and utilization (editorial views) [Ament], 88  
surgical care needs and utilization (special article) [Moore], 125  
nurse anesthetists  
surgical care needs and utilization (editorial views) [Ament], 88  
surgical care needs and utilization (special article) [Moore], 125  
residents  
surgical care needs and utilization (editorial views) [Ament], 88  
surgical care needs and utilization (special article) [Moore], 125
- MARSHALL, I. G., see SINGH, Y. N., jt. auth.
- MATHURBHUTHAM, M., see SALEM, M. R., jt. auth. (2)
- Maxillofacial surgery, see under Surgery
- MAZZE, R. I., see WHARTON, R. S., jt. auth.
- MCCAFFERTY, L. A., see TSUEDA, K., jt. auth.
- MCCAMMON, R. I., VIEGAS, O. J., STOELTING, R. K., and DRYDEN, G. E., Naloxone reversal of choledochoduodenal sphincter spasm associated with narcotic administration (clinical report), 437
- McCredie, J. A., *Basic Surgery* (book review), 164
- MCKENZIE, R., see WADHWA, R. K., jt. auth.
- MCLAUGHLIN, D. F., Esophageal stethoscopes not hazardous (correspondence), 382
- , General anesthesia by dentists unacceptable (correspondence), 384

- McLESKEY, C. H., see LAMAN, E. N., jt. auth.  
McPECK, B., see ROGERS, M. C., jt. auth.
- Measurement techniques  
Doppler ultrasound, embolism, air, monitoring, venous [English & others], 425  
pulmonary arterial pressure, catheter sterility maintenance during manipulation after placement (clinical report) [Kopman & Sandza], 373
- Mechanical inspiratory peak flow, see under Ventilation  
Mechanical ventilation, see under Ventilation  
Mechanism of action, see Theories of anesthesia  
MEGX, see Anesthetics, local, lidocaine, monoethylglycinexylidide  
Membrane  
erythrocyte, lidocaine effects on in stored blood (correspondence) [Abouleish & others], 295  
models, intermolecular interactions and anesthesia (special article) [Sandorfy], 357
- Meningitis, see under Complications  
MERIN, R. G., New implications of fasting (editorial views), 236  
—, see SONNTAG, H., jt. auth.
- Metabolism  
see also under Biotransformation (drug); individual organs  
acetylcholine concentrations and turnover in brain during anesthesia with halothane, enflurane, and ketamine [Ngai & others], 4  
amino acids, phenobarbital effect on in rat brain [Chapman & others], 175  
anesthetic, see Biotransformation (drug)  
citric acid cycle, phenobarbital effect on in rat brain [Chapman & others], 175  
fasting  
epinephrine-induced arrhythmia during halothane anesthesia response to [Miletich & others], 245  
halothane or diethyl ether with, hepatic morphology responses to [Ross & Cardell], 325  
new implications (editorial views) [Merin], 236  
glucose  
brain uptake, local, in awake and halothane-anesthetized primates [Shapiro & others], 97  
phenobarbital effect on in rat brain [Chapman & others], 175  
hepatic  
cytochrome  $b_5$  responses to halothane and diethyl ether [Ross & Cardell], 325  
cytochrome  $P_{450}$  responses to halothane and diethyl ether [Ross & Cardell], 325  
microsomal drug-metabolizing enzymes, induction after diethyl ether or halothane [Ross & Cardell], 325  
smooth endoplasmic reticulum proliferation after diethyl ether or halothane [Ross & Cardell], 325  
microsomes, see under Biotransformation (drug)  
Metabolites, see under Biotransformation (drug); Toxicity; individual agents  
Methoxyflurane, see under Anesthetics, volatile  
Metocurine, see under Neuromuscular relaxants  
MEYERS, E. F., KRUPIN, T., JOHNSON, M., and ZINK, H., Failure of nondepolarizing neuromuscular blockers to inhibit succinylcholine-induced increased intraocular pressure, a controlled study (clinical report), 149
- Microcirculation  
norepinephrine effect during halothane anesthesia in rat [Yamaki & others], 332  
vasopressin effect during halothane anesthesia in rat [Yamaki & others], 332
- Microsomes, see under Biotransformation (drug); Liver, metabolism; Metabolism, hepatic  
Microvasculature, see Microcirculation  
MILETICH, D. J., ALBRECHT, R. F., and SEALS, C., Responses to fasting and lipid infusion of epinephrine-induced arrhythmias during halothane anesthesia, 245  
MILLER, E. D., JR., ACKERLY, J. A., and PEACH, M. J., Blood pressure support during general anesthesia in a renin-dependent state in the rat, 404  
—, LONGNECKER, D. E., and PEACH, M. J., The regulatory function of the renin-angiotensin system during general anesthesia, 399  
—, SANDERS, D. B., ROWLINGSON, J. C., BERRY, F. A., JR., SUSSMAN, M. D., and EPSTEIN, R. M., Anesthesia-induced rhabdomyolysis in a patient with Duchenne's muscular dystrophy (clinical report), 146  
MILLER, K. W., and WILSON, M. W., The pressure reversal of a variety of anesthetic agents in mice, 104  
MILLER, R. D., see THOMPSON, G. E., jt. auth.  
MILLMAN, B. S., Emory University Conference on Pain (report of scientific meeting), 81  
MIPF, see Ventilation, mechanical inspiratory peak flow  
MITCHELL, L. A., and BROOKS, J. L., JR., Succinylcholine pretreatment unsatisfactory (correspondence), 297  
Models, see under Membrane; Pharmacokinetics  
Moir, D. D., *Obstetric Anaesthesia and Analgesia* (book review), 161  
Molecules, polar interaction, see under Theories of anesthesia, polar  
Monitoring  
see also Equipment, monitors; Measurement techniques  
electrocardiography, blood pressure deleterious effects from apparently trivial atrial dysrhythmia (clinical report) [Bobal], 282  
electroencephalography  
changes during anesthesia (correspondence) [Tinker & Sharbrough], 230  
changes during anesthesia (correspondence) [Yanagida], 229  
embolism, air, venous, methods compared in supine dogs [English & others], 425  
Monoethylglycinexylidide, see under Anesthetics, local, lidocaine  
MOORE, F. D., American Society of Anesthesiologists Rovenstine Lecture—1976: anesthesia and surgical care (special article), 125  
Morbid obesity, see under Complications, obesity  
MORIO, M., see MUKAI, S., jt. auth.  
MORLEY, T. S., Internal vs. external diameter of pediatric endotracheal tubes (correspondence), 157  
Mouthpiece, see under Equipment, airway  
MUKAI, S., MORIO, M., FUJII, K., and HANAKI, C., Artificial metabolites of halothane? (correspondence), 296  
MULLER, J., see HULL, M. T., jt. auth.  
MUNSON, E. S., and EMBRO, W. J., Lidocaine, monoethylglycinexylidide, and isolated human uterine muscle, 183  
MURRAY, W. R., see THOMPSON, G. E., jt. auth.
- Muscle  
skeletal  
caffeine-induced contractures in malignant hyperthermia *in-vitro* model, differential effects of inhalational anesthetics [Reed & Strobel], 254  
dystrophy, Duchenne's, anesthesia-induced rhabdomyolysis in (clinical report) [Miller & others], 146  
malignant hyperthermia, morphologic abnormalities (clinical report) [Hull & others], 223  
sarcoplasmic reticulum, malignant hyperthermia *in-vitro* model, caffeine-induced contractures, differential effects of inhalational anesthetics [Reed & Strobel], 254  
smooth, see under Arteries; Lung, bronchi; Veins  
Muscle relaxants, see Neuromuscular relaxants  
Myasthenia, see under Complications  
Myelography, see under Spinal cord  
Myocardial function, see under Heart  
Myocardium, see under Heart  
Myometrium, see under Uterus
- NADPH cytochrome c reductase, see under Enzymes, cytochrome c reductase  
NAGLE, J. P., see TSUEDA, K., jt. auth.  
Naloxone, see under Antagonists, narcotic  
Narcotic, see under Analgesics, narcotic  
Narcotic antagonists, see under Antagonists

- Neonate, see under Anesthesia, obstetric; Anesthesia, pediatric
- Neostigmine, see under Antagonists, neuromuscular relaxants; Enzymes, cholinesterase
- Nerve  
block  
see also under Anesthetic techniques, regional  
conduction, frequency-dependent, role of nerve impulse pattern in local anesthetic potency [Courtney & others], 111  
conduction block, frequency-dependent, role of nerve impulse pattern in local anesthetic potency [Courtney & others], 111
- Nervous system, see under Neuromuscular transmission; Parasympathetic nervous system; Sympathetic nervous system
- Neuromuscular block, see under Neuromuscular relaxants
- Neuromuscular junction, blocking agent vagolytic action at pacemaker of isolated guinea pig atrium [Lee Son & Waud], 191
- Neuromuscular relaxants  
alpha-bungarotoxin  
edrophonium interaction with [Lee & others], 311  
in study of neuromuscular transmission (editorial views) [Chang], 309  
antagonists, see under Antagonists  
beta-bungarotoxin  
edrophonium interaction with [Lee & others], 311  
in study of neuromuscular transmission (editorial views) [Chang], 309  
bungarotoxins, alpha- and beta-, edrophonium interaction with [Lee & others], 311  
dimethyltubocurarine, see Neuromuscular relaxants, metocurine gallamine  
succinylcholine-induced intraocular pressure increase not inhibited by (clinical report) [Meyers & others], 149  
vagolytic action at pacemaker of isolated guinea pig atrium [Lee Son & Waud], 191  
metocurine, vagolytic action at pacemaker of isolated guinea pig atrium [Lee Son & Waud], 191  
nitrogen mustard causing block in myasthenia (correspondence) [Colhoun & Rylett], 381  
pancuronium  
obesity, morbid, effect on requirement (clinical report) [Tsueda & others], 438  
vagolytic action at pacemaker of isolated guinea pig atrium [Lee Son & Waud], 191  
succinylcholine  
intraocular pressure increase by not inhibited by nondepolarizing neuromuscular blockers (clinical report) [Meyers & others], 149  
pretreatment with small doses (correspondence) [Baraka], 298  
pretreatment with small doses (correspondence) [Hohmann], 297  
pretreatment with small doses (correspondence) [Mitchell & Brooks], 297  
pseudocholinesterase, abnormal levels in surgical population (clinical report) [Oropollo], 284  
thio-tapa causing block in myasthenia (correspondence) [Colhoun & Rylett], 381  
d-tubocurarine  
antibiotic-induced paralysis of mouse phrenic nerve-hemi-diaphragm preparation, and reversibility by calcium and by neostigmine [Singh & others], 418  
muscular responses, differential, inspiratory muscles and peripheral muscle groups of anesthetized man (clinical report) [Wymore & Eisele], 360  
succinylcholine-induced intraocular pressure increase not inhibited by (clinical report) [Meyers & others], 149  
vagolytic action at pacemaker of isolated guinea pig atrium [Lee Son & Waud], 191
- Neuromuscular transmission  
antibiotic-induced paralysis of mouse phrenic nerve-hemi-diaphragm preparation, and reversibility by calcium and by neostigmine [Singh & others], 418  
bungarotoxins  
alpha- and beta-, edrophonium interactions with [Lee & others], 311  
in study of (editorial views) [Chang], 309  
edrophonium, alpha- and beta-bungarotoxin interactions [Lee & others], 311  
nicotinic agonist, DMPP, dopamine release induced by, anesthetic alteration in rat striatal slices [Westfall & others], 118  
nitrogen mustard and thio-tapa blockade (correspondence) [Colhoun & Rylett], 381  
refractory period, frequency-dependent conduction block [Courtney & others], 111
- Neurosurgical anesthesia, see under Anesthesia
- Neurotoxicity, see under Toxicity
- Neurotoxin, see under Toxicity
- Neurotransmitters, see under Parasympathetic nervous system; Sympathetic nervous system
- New, M. I., and Levine, L. S. (eds.), *Juvenile Hypertension* (book review), 451
- Newborn, see under Anesthesia, obstetric; Anesthesia, pediatric
- NGAI, S. H., CHENEY, D. L., and FINCK, A. D., Acetylcholine concentrations and turnover in rat brain structures during anesthesia with halothane, enflurane, and ketamine, 4
- Nicotinic transmission, see under Neuromuscular transmission
- Nitrogen, see under Gases, nonanesthetic
- Nitrogen mustard, see under Pharmacology
- Nitroprusside, see under Anesthetic techniques, hypotension, induced
- Nitrous oxide, see under Anesthetics, gases
- NORDSTRÖM, C.-H., see CHAPMAN, A. G., jt. auth.
- Norepinephrine, see under Sympathetic nervous system, catecholamines
- Nurse anesthetists, see under Manpower
- Obesity, see under Complications
- Obstetric anesthesia, see under Anesthesia
- Occlusion, see under Complications
- Occupational exposure, see under Anesthetics, gases, trace concentrations; Anesthetics, volatile, trace concentrations; Operating rooms
- O'CONNOR, T., see SPRISLER, G. T., jt. auth.
- OLSHWANG, D., see PEREL, A., jt. auth.
- Ophthalmic surgery, see under Surgery
- Organizations  
American Board of Anesthesiology, decision making, how faculty members define competence [Orkin & Greenhow], 267  
American Society of Anesthesiologists  
Rovenstine Lecture—1976 (special article) [Moore], 125  
Rovenstine Lecture—1977 (special article) [Eckenhoff], 272  
Society for Obstetric Anesthesia and Perinatology, ninth annual meeting (report of scientific meeting) [Ralston & Ostheimer], 158
- ORKIN, F. K., and GREENHOW, D. E., A study of decision making: how faculty define competence, 267
- ORKIN, L. R., see YAMAKI, T., jt. auth.
- OROPOLLO, A. T., Abnormal pseudocholinesterase levels in a surgical population (clinical report), 284
- Orthopedic surgery, see under Surgery
- OSBORNE, R., see WARD, C. F., jt. auth.
- OSTHEIMER, G. W., see RALSTON, D. H., jt. auth.
- Oxygen  
concentration, ophthalmic surgery, minienvironmental control under drapes (clinical report) [Ramanathan & others], 286  
consumption, brain, nitrous oxide effect on in dog [Sakabe & others], 195  
tension, arterial, positive end-expiratory pressure effect on in obesity (clinical report) [Salem & others], 280
- PACHYS, F., see PEREL, A., jt. auth.
- PAEGLE, R. D., see BERNHARD, W. N., jt. auth.

- Pain**  
 measurement, Emory University Conference on Pain (report of scientific meeting) [Millman], 81  
 treatment, Emory University Conference on Pain (report of scientific meeting) [Millman], 81
- Pancuronium**, see under Neuromuscular relaxants
- PAPPAS, G.**, see KOPRIVA, C. J., jt. auth.
- Paralysis**, see under Muscle, skeletal; Nerve, damage; Neuromuscular transmission
- Parasympathetic nervous system**  
 acetylcholine metabolism in brain, anesthetics and (editorial views) [Hanin], 1
- atropine**  
 gastric fluid pH and volume responses to in adult patient (clinical report) [Stoelting], 367  
 glycopyrrolate and, comparative penetration of blood-brain and placental barriers [Proakis & Harris], 339  
 neuromuscular blocking agent vagolytic action at pacemaker of isolated guinea pig atrium [Lee Son & Waud], 191  
 vagus, neuromuscular blocking agent vagolytic action at pacemaker of isolated guinea pig atrium [Lee Son & Waud], 191
- Parbrook, G. D., Parbrook, E. O., and Munk, I. B.**, *Audiotape Slide Programme on Clinical Physics and Measurements for the Anaesthetist* (review of audiovisual aids), 452
- PARKER, L. A.**, Prevention of ventilator hazards (correspondence), 300
- PATEL, C.**, see CHALON, J., jt. auth.
- PAUTLER, S.**, see WATERMAN, P. M., jt. auth.
- PEACH, M. J.**, see MILLER, E. D., Jr., jt. auth. (2)
- Pediatric anesthesia**, see under Anesthesia
- PEEP**, see Ventilation, positive end-expiratory pressure
- Penicillins**, see under Antibiotics
- Pentobarbital**, see under Anesthetics, intravenous
- PEREL, A., PACHYS, F., OLSHWANG, D., and COTEV, S.**, Mechanical inspiratory peak flow as a determinant of tidal volume during IMV and PEEP (clinical report), 290
- Peripheral vascular resistance**, see under Arteries; Blood pressure
- PETTINGER, W. A.**, Anesthetics and the renin-angiotensin-aldosterone axis (editorial views), 393
- pH**, see under Acid-base equilibrium; Carbon dioxide, hypercarbia; Carbon dioxide, hypocarbia; Dissociation constant; Gases, nonanesthetic, hydrogen
- Pharmacokinetics**  
 neural, epinephrine effects on lidocaine duration of action [Fink & others], 263  
 uptake, pancuronium requirement in morbid obesity (clinical report) [Tsueda & others], 438
- Pharmacology**  
 nitrogen mustard, thio-tepa and, neuromuscular block by (correspondence) [Colhoun & Rylett], 381  
 thio-tepa, nitrogen mustard and, neuromuscular block by (correspondence) [Colhoun & Rylett], 381
- Phenobarbital**, see under Anesthetics, intravenous; Anticonvulsants; Biotransformation (drug); Hypnotics, barbiturates; Induction, enzyme
- PIHLAJANIEMI, R.**, see HOLLMEN, A. I., jt. auth.
- Pipelines, gas**, see under Equipment
- Piping, gas**, see under Equipment
- Placenta**  
 see also under Anesthesia, obstetric; Pregnancy  
 atropine and glycopyrrolate, comparative penetration [Proakis & Harris], 339  
 glycopyrrolate and atropine, comparative penetration [Proakis & Harris], 339  
 regional anesthesia effects on fetus and neonate [review article] [Ralston & Shnider], 34
- Platelet**, see under Blood
- Pneumoencephalography**, see under Brain
- Pneumonitis**, see under Complications
- Pneumoperitoneum**, see under Surgery
- Pneumothorax**, see under Complications
- Polar intermolecular interactions**, see under Theories of anesthesia
- Polymyxins**, see under Antibiotics
- Polypeptides**  
 antagonists  
 saralasin, blood pressure support during general anesthesia in renin-dependent state in rat [Miller & others], 404  
 saralasin, renin-angiotension system regulatory function during general anesthesia demonstrated with [Miller & others], 399  
 renin-angiotensin  
 blood pressure support during general anesthesia in renin-dependent state in rat [Miller & others], 404  
 regulatory function during general anesthesia [Miller & others], 399  
 renin-angiotensin-aldosterone axis, anesthetics and (editorial views) [Pettinger], 393
- POPE, W. D. B., HALSEY, M. J., LANSDOWN, A. B. G., SIMMONDS, A., and BATEMAN, P. E.**, Fetotoxicity in rats following chronic exposure to halothane, nitrous oxide, or methoxyflurane, 11
- Positive end-expiratory pressure**, see under Ventilation
- Post-lumbar-puncture headache**, see Complications, headache, post-spinal
- Post-spinal headache**, see under Complications, headache
- Potency, anesthetic, indices relating to respiratory arrest and cardiac failure** [Wolfson & others], 187
- PRASERTWANITCH, Y., and GABEL, R. A.**, Cerebrospinal fluid pressure and subarachnoid gas composition during nitrous oxide anesthesia for gas myelography (clinical report), 214
- Premedication**  
 see also under Analgesics; Hypnotics  
 antacid, magaldrate (Riopan), gastric fluid pH and volume responses to (clinical report) [Stoelting], 367  
 anticholinergics  
 atropine, glycopyrrolate, and Riopan, gastric fluid pH and volume responses to (clinical report) [Stoelting], 367  
 glycopyrrolate and atropine, comparative penetration of blood-brain and placental barriers [Proakis & Harris], 339  
 atropine  
 gastric fluid pH and volume responses to in adult patients (clinical report) [Stoelting], 367  
 glycopyrrolate and, comparative penetration of blood-brain and placental barriers [Proakis & Harris], 339  
 glycopyrrolate  
 atropine and, comparative penetration of blood-brain and placental barriers [Proakis & Harris], 339  
 gastric fluid pH and volume responses to in adult patients (clinical report) [Stoelting], 367
- Pressure**, see under Abdomen, intra-abdominal; Blood pressure; Brain, intracranial; Cerebrospinal fluid; Eye, intraocular; Heart, atrial, Heart, ventricular; Hyperbaria; Hypobaria; Lung, intravascular; Microcirculation; Temperature, vapor; Ventilation, airway, Ventilation, inspiratory; Ventilation, positive end-expiratory; Ventilation, zero end-expiratory
- Pressure reversal of anesthesia**, see under Theories of anesthesia
- PRIIDDY, S.**, see RAVINDRAN, R., jt. auth.
- PRIESTLY, B. G.**, see STACEY, N. H., jt. auth.
- PROAKIS, A. G., and HARRIS, G. B.**, Comparative penetration of glycopyrrolate and atropine across the blood-brain and placental barriers in anesthetized dogs, 339
- Procaine**, see under Anesthetics, local
- Propranolol**, see under Heart; Sympathetic nervous system, sympatholytic agents
- Prostaglandins**, see under Hormones
- Protamine**, see under Blood, coagulation
- PRYS-ROBERTS, C.**, see SMITH, N. T., jt. auth.
- Pseudocholinesterase**, see under Biotransformation (drug); Enzymes
- Psychologic responses, anxiety, premedication subjective effects vs. sedation** (correspondence) [Conner], 300

- Pulmonary, see Lung  
Pulmonary-artery catheter, see under Equipment, catheters  
Pulse, see under Heart  
PUUKKA, M., see HOLLMEN, A. I., jt. auth.  
Pyrexia, see Hyperthermia
- Radial artery, see under Arteries  
RADKE, J., see SONNTAG, H., jt. auth.  
RALSTON, D. H., and OSTHEIMER, G. W., Society for Obstetric Anesthesia and Perinatology (report of scientific meeting), 158  
—, and SHNIDER, S. M., The fetal and neonatal effects of regional anesthesia in obstetrics (review article), 34  
RAMAMURTHY, N., see MANI, M., jt. auth.  
RAMANATHAN, S., CAPAN, L., CHALON, J., RAND, P. B., KLEIN, G. S., and TURNDORF, H., Minienvironmental control under the drapes during operations on the eyes of conscious patients (clinical report), 286  
—, see CHALON, J., jt. auth.  
RAMILIO, J., see SALEM, M. R., jt. auth.  
RAND, P. B., see RAMANATHAN, S., jt. auth.  
RANTAKYLÄ, P., see HOLLMEN, A. I., jt. auth.  
RAO, T. L. K., SALEM, M. R., and WONG, A. Y., Supraclavicular internal-jugular-vein catheterization—further caution (correspondence), 448  
—, see MANI, M., jt. auth.  
RAVINDRAN, R., Hypotension from a nodal rhythm (correspondence), 229  
—, and PRIDDY, S., Uvular edema, a rare complication of endotracheal intubation (clinical report), 374  
RAYBURN, R. L., and GRAVES, S. A., A new concept in controlled ventilation of children with the Bain anesthetic circuit, 250  
RAYMON, F., see BEHNIA, R., jt. auth.  
REDDING, J. S., *Life Support—The Essentials* (book review), 162  
REED, S. B., and STROBEL, G. E., JR., An *in-vitro* model of malignant hyperthermia: differential effects of inhalation anesthetics on caffeine-induced muscle contractions, 254  
Refractory period, see under Neuromuscular transmission  
Regional anesthesia, see under Anesthetic techniques, regional  
REIVICH, M., see SHAPIRO, H. M., jt. auth.  
Renal, see Kidney  
Renin, see under Polypeptides  
Reproduction, halothane chronic exposure effects on in mice [Wharton & others], 167  
Residents, see under Education; Manpower  
Respiration, see Ventilation  
Respirator, see Equipment, ventilators  
Reversal of anesthesia, see under Anesthesia  
Riopan, see Premedication, antacid, magaldrate  
ROBERTS, B. B., Sterilization of anesthetic apparatus (correspondence), 388  
ROBERTS, R. B. (ed.), *Pulmonary Aspiration* (book review), 163  
ROGERS, M. C., BATTIT, G., McPECK, B., and TODD, D., Lateralization of sympathetic control of the human sinus node: ECG changes of stellate ganglion block (clinical report), 139  
ROIZEN, M. F., see FORBES, A. R., jt. auth.  
ROSS, W. T., JR., and CARDELL, R. R., JR., Proliferation of smooth endoplasmic reticulum and induction of microsomal drug-metabolizing enzymes after ether or halothane, 325  
Rovenstine Lecture, see under Organizations, American Society of Anesthesiologists  
ROWLINGSON, J. C., see MILLER, E. D., JR., jt. auth.  
RYLETT, B. J., see COLHOUN, E. H., jt. auth.
- Sahs, A. L., Hartman, E. C., and Aronson, S. M., *Guidelines for Stroke Care* (book review), 302  
SAIDMAN, L. J., see DIAMANT, M., jt. auth.  
—, see WARD, C. F., jt. auth.
- SAKABE, T., KURAMOTO, T., INOUE, S., and TAKESHITA, H., Cerebral effects of nitrous oxide in the dog, 195  
SALEM, M. R., DALAL, F. Y., ZYGMUNT, M. P., MATHURBHUTHAM, M., and JACOBS, H. K., Does PEEP improve intraoperative arterial oxygenation in grossly obese patients? (clinical report), 280  
—, WONG, A. Y., MATHURBHUTHAM, M., RAMILIO, J., JACOBS, H. K., and BENNETT, E. J., Evaluation of selective bronchial suctioning techniques used for infants and children (clinical report), 379  
—, see RAO, T. L. K., jt. auth.  
Saline solution, epidural placement compared with epidural blood placement in treatment of post-spinal headache (clinical report) [Bart & Wheeler], 221  
SANDERS, D. B., see MILLER, E. D., JR., jt. auth.  
SANDORF, C., Intermolecular interactions and anesthesia (special article), 357  
SANDZA, J. C., JR., see KOPMAN, E. A., jt. auth.  
Saralasin, see under Polypeptides, antagonists  
Sarcoplasm, see under Muscle, skeletal  
SAUBERMANN, A. J., see DuMOULIN, G. C., jt. auth.  
SAUNDERS, J., see WESTFALL, T. C., jt. auth.  
Scavengers, see under Equipment; Equipment, exhaust systems; Operating rooms, exhaust systems  
SCHOLES, J. V., see HOAR, P. F., jt. auth.  
SCHWARTZ, A. J., Supraclavicular internal-jugular-vein catheterization—further caution (correspondence), 448  
—, and DOWNES, J. J., Esophageal stethoscopes not hazardous (correspondence), 382  
Scranton, P. E., JR., *Practical Techniques in Venipuncture* (book review), 390  
SEALS, C., see MILETICH, D. J., jt. auth.  
SEARS, B. E., Prevention of ventilation hazards (correspondence), 300  
Sedatives, see under Hypnotics  
Seizure, see under Brain, convulsions; Complications, convulsions; Toxicity, convulsions  
Selector valve, see under Equipment, valves  
SENTKER, C. R., see HILL, G. E., jt. auth.  
SHAPIRO, H. M., Symposium on Cerebral Blood Flow (report of scientific meeting), 231  
—, GREENBERG, J. H., REIVICH, M., ASHMEAD, G., and SOKOLOFF, L., Local cerebral glucose uptake in awake and halothane-anesthetized primates, 97  
SHARBROUGH, F. W., see TINKER, J. H., jt. auth.  
SHARMAHD, S., see BEHNIA, R., jt. auth.  
SHAW, C. L., see HILL, G. E., jt. auth.  
SHIMIZU, H., see AOKI, N., jt. auth.  
SHNIDER, S. M., see BIEHL, D., jt. auth.  
—, see RALSTON, D. H., jt. auth.  
SIESJÖ, B. K., see CHAPMAN, A. G., jt. auth.  
SIKER, E. S., see WOLFSON, B., jt. auth.  
SIMMONDS, A., see POPE, W. D. B., jt. auth.  
SINGH, Y. N., HARVEY, A. L., and MARSHALL, I. G., Antibiotic-induced paralysis of the mouse phrenic nerve—hemidiaphragm preparation, and reversibility by calcium and by neostigmine, 418  
Sinoatrial node, see under Heart  
SIRCAR, S., and KIM, B. M., Adsorption of ether by activated charcoal (correspondence), 78  
Size, body, see under Pharmacokinetics, uptake  
Skeletal muscle, see under Muscle  
Skull fracture, see under Complications, fractures  
SMITH, N. T., CALVERLEY, R. K., PRYS-ROBERTS, C., EGER, E. I., II, and JONES, C. W., Impact of nitrous oxide on the circulation during enflurane anesthesia in man, 345  
SMITH, R. B., see WATERMAN, P. M., jt. auth.  
Smooth muscle, see under Arteries; Lung, bronchi; Veins  
SNP, see Anesthetic techniques, hypotension, induced, nitroprusside

- Society for Obstetric Anesthesia and Perinatology, see under Organizations
- Sodium, see under Ions
- Sodium nitroprusside, see Anesthetic techniques, hypotension, induced, nitroprusside
- SOKOLOFF, L., see SHAPIRO, H. M., jr. auth.
- Solubility
- blood-brain barrier, glycopyrrolate and atropine penetration compared [Proakis & Harris], 339
  - placental barrier, glycopyrrolate and atropine penetration compared [Proakis & Harris], 339
- SONTAG, H., DONATH, U., HILLEBRAND, W., MERIN, R. G., and RADKE, J., Left ventricular function in conscious man and during halothane anesthesia, 320
- SOSMAN, M. B., see FINEBERG, H. V., jr. auth.
- Spasm, see under Complications
- Sphincter spasm, see under Complications, spasm
- Spinal anesthesia, see under Anesthetic techniques
- Spinal cord
- dermatomes, spinal anesthesia effect (clinical report) [Forbes & Roizen], 440
  - myelography, gas, nitrous oxide anesthesia for, cerebrospinal fluid pressure and subarachnoid gas composition during (clinical report) [Prasertwanitch & Gabel], 214
  - spinal anesthesia effect on (clinical report) [Forbes & Roizen], 440
  - subarachnoid space
    - catheter tip migration into causing inadvertent subarachnoid anesthesia (clinical report) [Ward & others], 362
    - gas composition in during nitrous oxide anesthesia for gas myelography (clinical report) [Prasertwanitch & Gabel], 214
- SPRISSLER, G. T., and O'CONNOR, T., Evaluation of left ventricular function (correspondence), 383
- STACEY, N. H., PRIESTLY, B. G., and HALL, R. C., Toxicity of halogenated volatile anesthetics in isolated rat hepatocytes, 17
- STANLEY, T. H., see ENGLISH, J. B., jr. auth.
- Stefanis, C., Dornbush, R., and Fink, M. (eds.), *Hashish: Studies of Long-term Use* (book review), 392
- Stellate ganglion, see under Anatomy; Anesthetic techniques, regional
- Sterility, pulmonary-artery catheter after placement (clinical report) [Kopman & Sandza], 373
- Sterilization
- anesthesia machines
    - (correspondence [Beck], 387
    - (correspondence) [du Moulin & Saubermann], 389
    - (correspondence) [Roberts], 388
    - (correspondence) [Warshauer], 388
- Steroids, see under Anesthetics, intravenous; Hormones, adrenal
- Stethoscope, see under Equipment
- STEVENS, W. C., see THOMPSON, G. E., jr. auth.
- STOELTING, R. K., Responses to atropine, glycopyrrolate, and Riopan of gastric fluid pH and volume in adult patients (clinical report), 367
- , see McCAMMON, R. L., jr. auth.
- Stomach, see under Gastrointestinal tract; Vomiting
- STONE, J. G., see HOAR, P. F., jr. auth.
- Streilein, J. W., and Hughes, J. D., *Immunology. A Programmed Text* (book review), 160
- STROBEL, G. E., JR., see REED, S. B., jr. auth.
- Subarachnoid space, see under Anatomy; Spinal cord
- Subcutaneous emphysema, see under Complications, emphysema
- Succinylcholine, see under Neuromuscular relaxants
- Suctioning, bronchial, see under Lung, bronchus; Lung, trachea
- Surgery
- cesarean section, neurologic activity of infants following anesthesia for [Hollmen & others], 350
  - facial, see under Surgery, maxillofacial
  - jejunoileal bypass, positive end-expiratory pressure effects on arterial oxygenation during (clinical report) [Salem & others], 280
  - laparoscopy
    - gas embolism during (clinical report) [Wadhwa & others], 74
  - halothane and hypovolemia interaction with hemodynamics of increased intra-abdominal pressure [Diamant & others], 23
  - maxillofacial, hazards of blind wiring of fracture (correspondence) [Bowden], 79
  - ophthalmic, drapes, minienvironmental control under (clinical report) [Ramanathan & others], 286
  - orthopedic, hip replacement, total, hypotensive anesthesia for, blood loss and organ function after [Thompson & others], 91
  - pneumoperitoneum, halothane and hypovolemia interaction with hemodynamics of increased intra-abdominal pressure [Diamant & others], 23
  - wiring of fracture, facial, hazards (correspondence) [Bowden], 79
- Surgical drapes, see under Equipment, drapes
- SUSSMAN, M. D., see MILLER, E. D., JR., jr. auth.
- Swan-Ganz catheter, see under Equipment, catheters
- Sympathetic nervous system
- beta-adrenergic receptors, blockade, propranolol effect on hemodynamics during general anesthesia [Kopriva & others], 28
- catecholamines
- anesthetic effects on release [Westfall & others], 118
  - epinephrine effects on duration of lidocaine-induced nerve block [Fink & others], 263
  - epinephrine, ketamine interactions with at normothermia and hypothermia in isolated rabbit heart [Hill & others], 315
  - norepinephrine, ketamine interactions with at normothermia and hypothermia in isolated rabbit heart [Hill & others], 315
  - norepinephrine, microvascular response to during halothane in rat [Yamaki & others], 332
- dopamine
- anesthetic-induced alterations of stimulation-induced release from rat striatal slices [Westfall & others], 118
  - cardiovascular vs. renal effects (correspondence) [Birch], 153
  - cardiovascular vs. renal effects (correspondence) [Zimmerman], 153
  - ketamine interactions with at normothermia and hypothermia in isolated rabbit heart [Hill & others], 315
- stellate ganglion block, Horner's syndrome (clinical report) [Rogers & others], 139
- sympathomimetic agents, isoproterenol, ketamine interactions with at normothermia and hypothermia in isolated rabbit heart [Hill & others], 315
- tyramine, ketamine interactions with at normothermia and hypothermia in isolated rabbit heart [Hill & others], 315
- Synchronized intermittent mandatory ventilation, see under Ventilation, mechanical, intermittent mandatory
- Tachycardia, see under Heart, arrhythmia
- TAKESHITA, H., see SAKABE, T., jr. auth.
- TAYLOR, F. H., see ABOULEISH, E., jr. auth.
- Teeth, see under Anesthesia, dental; Complications, dental; Pain, experimental
- Temperature
- ambient, regulation, ophthalmic surgery, minienvironmental control under drapes (clinical report) [Ramanathan & others], 286
  - ketamine interactions with vasoactive amines at hypothermia and normothermia in isolated rabbit heart [Hill & others], 315
- Teratogenicity, see under Pregnancy; Toxicity, fetal
- Tetracyclines, see under Antibiotics
- Theories of anesthesia
- critical volume, pressure reversal of anesthetics in mice [Miller & Wilson], 104
  - Pauling, polar intermolecular interactions and (special article) [Sandorfy], 357
  - polar intermolecular interactions (special article) [Sandorfy], 357
  - pressure reversal of anesthetics in mice [Miller & Wilson], 104



- Thiopental, see under Anesthetics, intravenous; Anesthetics, rectal
- Thio-tepa, see under Pharmacology
- THOMPSON, G. E., MILLER, R. D., STEVENS, W. C., and MURRAY, W. R., Hypotensive anesthesia for total hip arthroplasty: a study of blood loss and organ function (brain, heart, liver, and kidney), 91
- Thrombosis, see under Complications
- Tidal volume, see under Lung; Ventilation
- TINKER, J. H., and SHARBROUGHT, F. W., EEG changes during anesthesia (correspondence), 230
- TODD, D., see ROGERS, M. C., jr. auth.
- Toxicity
- convulsions, bupivacaine-induced seizure in obstetrics (correspondence) [DeVore & Asrani], 386
  - cyanide, nitroprusside metabolism in dogs awake and anesthetized with halothane [Behnia & others], 260
  - fetal
    - halothane, chronic exposure of mice to trace concentrations [Wharton & others], 167
    - halothane, study of (editorial views) [Van Dyke], 165
    - lidocaine placental transfer response to fetal acidosis [Biehl & others], 409
    - regional anesthesia in obstetrics (review article) [Ralston & Shnider], 34
    - teratogenicity, halothane chronic exposure [Pope & others], 11
    - teratogenicity, methoxyflurane chronic exposure [Pope & others], 11
    - teratogenicity, nitrous oxide chronic exposure [Pope & others], 11
  - hepatic, volatile anesthetics in isolated rat hepatocytes [Stacey & others], 17
  - neurotoxicity, infants following anesthesia for cesarean section [Hollmen & others], 350
  - neurotoxins, alpha- and beta-bungarotoxins, use in study of neuromuscular transmission (editorial views) [Chang], 309
  - reproductive
    - halothane, chronic exposure of mice to trace concentrations [Wharton & others], 167
    - halothane, study of (editorial views) [Van Dyke], 165
- Trace anesthetics, see under, Anesthetics, gases, trace concentrations; Anesthetics, volatile, trace concentrations; Equipment, exhaust systems; Operating rooms, exhaust systems; Toxicity
- Trachea, see under Lung
- Tracheal tube, see Equipment, tubes, endotracheal
- Transfusion
- hypotensive anesthesia for total hip arthroplasty, blood loss after [Thompson & others], 91
  - stored blood, lidocaine effects on erythrocytes and leukocytes (correspondence) [Abouleish & others], 295
- Transmission, see under Nerve, axon; Neuromuscular junction; Neuromuscular transmission; Sympathetic nervous system, ganglia
- Trauma, see under Complications
- Trissel, L. A., *Handbook on Injectable Drugs* (book review), 391
- TSUEDA, K., WARREN, J. E., MCCAFFERTY, L. A., and NAGLE, J. P., Pancuronium bromide requirement during anesthesia for the morbidly obese (clinical report), 438
- Tube, see under Equipment
- d*-Tubocurarine, see under Neuromuscular relaxants
- TURNDORF, H., see BERNHARD, W. N., jr. auth.
- , see CHALON, J., jr. auth.
- , see RAMANATHAN, S., jr. auth.
- Tyramine, see under Sympathetic nervous system
- Uterus
- contractility, lidocaine and monoethylglycinexylidide effects on [Munson & Embro], 183
  - regional anesthesia effects on fetus and neonate (review article) [Ralston & Shnider], 34
- Uvular edema, see under Complications, edema
- Vagus, see under Parasympathetic nervous system
- Valve, see under Equipment
- VAN DER STARRE, P. J. A., Wolff-Parkinson-White syndrome during anesthesia (clinical report), 369
- VAN DYKE, R. A., Halothane—a new perspective (editorial views), 165
- VANNUCCI, R. C., and WOLF, J. W., Oxidative metabolism in fetal rat brain during maternal anesthesia, 238
- Vasoactive amines, see under Sympathetic nervous system; Sympathetic nervous system, catecholamines
- Vasomotor center, see under Brain
- Vasopressin, see under Hormones, antidiuretic
- Veins
- cannulation
    - jugular, complications, supraclavicular catheterization, precaution (correspondence) [Rao & others], 448
    - jugular, complications, supraclavicular catheterization, precaution (correspondence) [Schwartz], 448
    - Swan-Ganz catheters associated with thrombogenesis (clinical report) [Hoar & others], 445
- Ventilation
- controlled, Bain anesthetic circuit used for in children, new concept [Rayburn & Graves], 250
  - hyperventilation, accidental ventilator-induced (clinical report) [Waterman & others], 141
  - inspiratory pressure, *d*-tubocurarine effects in respiratory and non-respiratory muscle groups, differential, examined by (clinical report) [Wymore & Eisele], 360
  - intermittent mandatory
    - mechanical inspiratory peak flow as determinant of tidal volume during (clinical report) [Perel & others], 290
    - mechanical, synchronized, device for (clinical report) [Aoki & others], 69
  - mechanical, intermittent mandatory, synchronized, device for (clinical report) [Aoki & others], 69
  - mechanical inspiratory peak flow, tidal volume determination during intermittent mandatory ventilation and positive end-expiratory pressure (clinical report) [Perel & others], 290
  - positive end-expiratory pressure
    - hypertensive crisis following (clinical report) [Kim & others], 365
    - mechanical inspiratory peak flow as determinant of tidal volume during (clinical report) [Perel & others], 290
    - obesity, morbid, intraoperative arterial oxygenation in (clinical report) [Salem & others], 280
  - tidal volume, mechanical inspiratory peak flow as determinant during intermittent mandatory ventilation and positive end-expiratory pressure (clinical report) [Perel & others], 290
- Ventilator, see under Equipment
- Ventricle, see under Heart
- Vickers, M. D., *Medicine for Anesthetists* (book review), 390
- VIEGAS, O. J., see McCAMMON, R. L., jr. auth.
- Vital capacity, see under Lung, capacity
- Volatile anesthetics, see under Anesthetics
- Volume, closing, see under Lung
- Volume, tidal, see under Lung
- WADIWA, R. K., MCKENZIE, R., WADIWA, S. R., KATZ, D. L., and BYERS, J. F., Gas embolism during laparoscopy (clinical report), 74
- WADIWA, S. R., see WADIWA, R. K., jr. auth.
- WAIBA, W. M., Airway closure and anesthesia (correspondence), 293
- Ultrastructure, hepatic, halothane and diethyl ether effects on [Ross & Cardell], 325
- Uptake, see under Induction; Pharmacokinetics
- Urethane, see under Hypnotics

- WALLACE, C. T., BAKER, J. D., III, and BROWN, C. S., Heated humidification for infants during anesthesia (correspondence), 80
- Wallace, J., *Blood Transfusion for the Clinicians* (book review), 160
- WARD, C. F., OSBORNE, R., BENUMOF, J. L., and SAIDMAN, L. J., A hazard of double-orifice epidural catheters (clinical report), 362
- WARNER, K. E., Acquisition and use of new medical knowledge (editorial views), 396
- WARREN, J. E., see TSUEDA, K., jt. auth.
- WARSHAUER, A. D., Sterilization of anesthetic apparatus (correspondence), 388
- WATERMAN, P. M., PAUTLER, S., and SMITH, R. B., Accidental ventilator-induced hyperventilation (clinical report), 141
- WAUD, D. R., see LEE SON, S., jt. auth.
- Weight, body, see under Complications, obesity; Pharmacokinetics, uptake
- WEIR, E. K., and GROVER, R. F., The role of endogenous prostaglandins in the pulmonary circulation (medical intelligence), 201
- Weiss, E. B., and Segal, M. S. (eds.), *Bronchial Asthma, Mechanisms and Therapeutics* (book review), 82
- West, J. B., *Ventilation/Blood Flow and Gas Exchange* (book review), 304
- WESTENSKOW, D., see ENGLISH, J. B., jt. auth.
- WESTFALL, T. C., DiFAZIO, C. A., and SAUNDERS, J., Local anesthetic- and halothane-induced alterations of the stimulation-induced release of <sup>3</sup>H-dopamine from rat striatal slices, 118
- WHARTON, R. S., MAZZE, R. L., BADEN, J. M., HITT, B. A., and DOOLEY, J. R., Fertility, reproduction and postnatal survival in mice chronically exposed to halothane, 167
- WHEELER, A. S., see BART, A. J., jt. auth.
- WICKS, A. E., see HOAR, P. F., jt. auth.
- WILLIAMS, G. D., see FLACKE, J. W., jt. auth.
- WILSON, M. W., see MILLER, K. W., jt. auth.
- WINNIE, A. P., see MANI, M., jt. auth.
- Wiring of fracture, see under Surgery
- WOERTH, S. D., see BULLARD, J. R., jt. auth.
- WOLF, J. W., see VANNUCCI, R. C., jt. auth.
- Wolff-Parkinson-White syndrome, see under Heart, arrhythmia
- WOLFSON, B., HETRICK, W. D., LAKE, C. L., and SIKER, E. S., Anesthetic indices—further data, 187
- WOLLMAN, H., see KLEIN, S. L., jt. auth.
- WONG, A. Y., see RAO, T. L. K., jt. auth.
- , see SALEM, M. R., jt. auth.
- WONG, K. C., see HILL, G. E., jt. auth.
- WYMORE, M. L., and EISELE, J. H., Differential effects of *d*-tubocurarine on inspiratory muscles and two peripheral muscle groups in anesthetized man (clinical report), 360
- YAMAKI, T., BAEZ, S., FELDMAN, S. M., GOOTMAN, P. M., and ORKIN, L. R., Microvascular responses to norepinephrine and vasopressin during halothane anesthesia in the rat, 332
- YANAGIDA, H., EEG changes during anesthesia (correspondence), 229
- YANG, E., see LEE, C., jt. auth.
- YOST, L. C., see BERNHARD, W. N., jt. auth.
- ZAMORA, J. D., Estimation of vital capacity (correspondence), 79
- ZIMMERMAN, B. L., Cardiovascular vs. renal effects of dopamine (correspondence), 153
- ZINK, H., see MEYERS, E. F., jt. auth.
- ZUKAITIS, M. G., and KOEHLER, L. S., Modified endobronchial tube (correspondence), 152
- ZYGMUNT, M. P., see SALEM, M. R., jt. auth.
